# Supplementary material for: Sutures vs. Adhesive Strips in Lumbar Spinal Fusion: Propensity-Matched Non-Inferiority Retrospective Analysis of Surgical Site Infections
Source: Research Square preprint supplement (doi:10.21203/rs.3.rs-6123787/v1), 2025-03-11
Supplement: Supplementary file 1 [file 3a788e4d9a90538e9e6b0047.xlsx]

## Sheet: Sheet1
Gender_F1M2	Intervention	Reintervention_y1	Days from surgery to infection	Age	ASA	Surgical_time	Diagnoses	Post-Op-WSZ.OP	Materialsuture0	Infectiony1	InfectiondeepnesA1,A2	Hospital stay	#surgeries	Duraplasty1y	Segments12	Drain_y1
1		0		31	1	102	A2# LWK2	SD LWK1-3	0	2		8	1		2	0
1	Wundinfekt dorsal	1	23	64	2	73	breitbasiger NPP Th11/12	Laminektomie Th11 mit dorsaler Stabilisierung Th11-12	0	1	A2	8	1		1	1
1		0		52	2	91	Deg. Instabilität L4/5, Facettenzyste	dSD L4/5, Dekompresseion mit Resektion der Zyste	0	2		8	1		1	1
1		0		82	3	181	Listhese<l4/5 OC L3/4 stenose l3-5	sd l3-5 +deko	0	2		9	1		2	0
2		0		86	2	88	Lumboischialgie rechts bei Spondylolysthese und Spondylolyse L5/S1	Dorsale Spondylodese L5/S1	0	2		7	1		1	1
1		0		62	2	105	Lumboischialgie links bei Degenerative Spondylolisthese L5/S1 im bei_x0001_Assimilationsstörungen im lumbosacralen Übergang	Dorsale Spondylodese L5/S1	0	2		8	1		1	1
1		0		75	2	64	Lumboischialgie links bei Spondylarthrose und Foraminalstenose L4/5	Dorsale Spondylodese L4/5	0	2		7	1		1	1
2		0		83	2	172	Degen. Instabilität L3-5	Dors. SD L3-5 (Legacy) & Deko in TLIF (Tezo-T) Duranaht bei Duraleck L3/4 links. Deko L3/4 u L4/5 links otp	0	2		7	1	1	2	1
2		0		61	2	229	OC, biseg.Instabilität, konsek Stenose	SD L3-5 mit Deko	0	2		8	1		2	0
1		0		67	2	105	lumbale Kyphose bei Treppenphänomen L3-5	dors relordosiernde SD L3-5 n Zielke	0	2		8	1		2	1
2		0		27	1	160	Spondylolyse L5 bds mit Spondylolisthesis vera L5/S1	dSD L5/S1 mit Reposition und Laminektomie L5	0	2		6	1		1	1
1		0		77	2	169	Instabilität mit deutlicher Rotationskomponente L2-4 und SKS	dorsale Korrekturspondylodese mit polysegementaler Relordosierung und Dekompression L2-4 von links	0	2		8	1		2	1
1		0		68	3	94	Degen. Instabilität L3/4 mit Spinalkanalstenose	Dorsale SD L3/4 (Neo) & Deko in TLIF (Tezo-T)	0	2		7	1		1	1
1		0		39	2	129	Lytische Spondylolisthese L5/S1	Dorsale SD L5/S1(Legacy), Laminektomie L5 mit Neurolyse L5 bds., Eigenspongiosa im Bandscheibenfach	0	2		5	1		1	0
2		0		49	2	105	deg instabil	SD L4/5 neon deko bds	0	2		6	1		1	0
1		0		75	2	119	Deg. Instabilität L3-5	dSD L3/5	0	2		26	3		2	1
2		0		69	2	122	Instabilität L4/5, Facettengelenkszyste	SD L4/5 (Instrumentierung Neo) in TLIF von rechts. Deko bds	0	2		5	1		1	1
1		0		74	2	138	Lumbalskoliose L3-5, konsek. Spinalkanal- und Foraminalstenose	SD L3-5 (Legacy) in TLIF von re (Tezo-T). Deko L3/4, L4/5, Neurolyse L3, L4 re	0	2		13	1		2	1
2		0		79	2	78	SKS mit deg Instabilität L4/5	relordosierende dSD L4/5 (uzentrum) mit Dekomperssion	0	2		8	1		1	1
1		0		77	3	155	deg. Listhese L4/5	dorsale SD L4/5	0	2		16	1		1	0
2		0		38	2	138	lyt. Olisthese unterstes Bewegungssegment	dorsale SD	0	2		7	1		1	0
1		0		86	3	123	Fraktur L4, SKS L3-5	SD L3-5 (Cosmic), Hemilaminektomie L3 u. L4 links, over-the-top Dekompression. Duraleck mit intakter Arachnoidea.	0	2		13	1	1	2	0
1		0		70	2	143	Deg. Instabilität u. SKS L4/5	SD L4/5 (Legacy) in TLIF v. links. Deko bds	0	2		7	1		1	1
1		0		69	3	159		dorsale Fusion L4/5 , deko L4/5 bds und L3/4 von links	0	2		9	1		1	0
2		0		80	2	102	Spondylolysthese L4/5 mit konsekutiver Stenose	Dekompression, dorsale Spondylodese, Relordosierung L4/5	0	2		5	1		1	1
1		0		78	3	125	Spinalkanalstenosen L2/3 und L3/4 bei degenerativer Spondylarthrose	Dorsale Spondylodese L2/3 und L3/4, Cageinterposition L3/4	0	2		11	1	1	2	1
2		0		59	2	132	OC L4/5	dprsale SD L4/5	0	2		7	1		1	0
2		0		78	2	109	Spinalkanalstenose mit Spondylarthrose L4/5	Dorsale Dekompression und Spondylodese L4/5	0	2		8	1		1	0
1		0		59	2	125	Spondylolisthese L4/5 mit hochgradiger Spinalakanalstenose	Dorsale Spondylodese L4/5 (System Legacy, Medtronic), Relordosierung, Tezo-t-Cage, autol.Spogiosa	0	2		6	1		1	1
1		0		80	2	133	SKS L4/5, Facettengelenksarthrose	SD L4/5 (Cosmic), Deko L4/5 bds, Duraleck links mit intakter Arachnoidea (ohne Liquorfluss)	0	2		7	1	1	1	1
2		0		79	3	94	Inkompletter Querschnitt, NPP Th4/5	SD Th4/5, Nucleotomie, Laminektomie, Sequester Debulging über rechte Costo-transversektomie	0	2		21	2		1	0
2		0		68	3	100	OC LWK3/4	SD LWK3/4	0	2		7	1		1	1
1		0		74	3	171	Instabilität, Entlordosierung, SKS L3-5	LordosierungsSD L3-5, Laminektomie L3 u. L4, in TLIF Technik von links	0	2		11	1		2	0
1		0		69	3	115	Listhese L3/4 OC L2/3	SD L2-4 +Deko	0	2		11	1		2	1
1		0		74	3	226	Kyphose lumbal, Listhese L3/4, Hochgr Stenose mit Paraparese	Dors. LordosierungsSD … (Legacy) & Deko in TLIF (Tezo-T)L3-5	0	2		20	1		2	0
1		0		79	3	140	Lumbaler Flachrücken mit Ventrolisthese L4/5 und Faacettengelenkszyste L4/5 rechts, SKS L3-L5	Dorsale relordosierende Korrekturspondylodese L3-L5 (System Legacy, Medtronic) nach Zielke, Neurolyse Duralschlauch	0	2		9	1		2	0
1		0		84	2	170	Listhese, NPP LWK4/5	SDLWK4/5 (Cosmic), Nuc	0	2		13	1	1	1	1
1		0		56	2	111	Drehgleiten L4/5	Dorsale Spondylodese L4/5 (System Legacy, Medtronic), TLIF-Cage von links, Relordosierung	0	2		6	1		1	0
1		0		60	2	141	25% Listhese L4/5 mit stenose	Sd LWK4/5	0	2		6	1		1	0
1		0		82	2	104	Spondylolisthese L4/5 mit konsekutiver Spinanlkanalstenose, Bandscheibenprotrusion L5/S1 links	Dorsale Spondylodese L4/5, Dekompression durch Laminektomie bds, Relordosierung, Dekompression L5/S1 links	0	2		7	1		1	1
1		0		76	2	103	Endgradige Spinalkanalstenose L3/4	Dekompression bds. und dorsale Spondylarthrose L3/4	0	2		21	1		1	1
1		0		79	2	191	25% Listhese Lwk4/5	SD LWK4-SWK1 mit postlat.Fusion, Cage LWK4/5	0	2		9	1	1	2	1
2		0		79	2	104	Spondylarthrose L4/5, mit Facettengelenkszyste links und konsekutiver Sponalkanalstenose	Dorsale Spondylodese L4/5, Dekompression über Laminotomie bds, Duranaht und Fett-Patch Plastik	0	2		9	1	1	1	1
2		0		72	2	184	Instabilität L4/5	dorsale SD L4/5	0	2		7	1		1	0
1		0		64	2	100	Spondylolisthese L4/5 mit konsekutiver Spinalkanalstenose	Dorsale relordosierende Korrekturspondylodese L4/5 (System Legacy, Medtronic), TLIF-Cage von links	0	2		6	1		1	1
1		0		82	3	190	kyphotische spondylisthese mit lordoseverlust L2-4 SKS L2-L5	relordisierung SD L2-4, laminiektomie L3, deko L2-5	0	2		27	2		2	0
1		0		77	3	170	kyphotische spondylesthese bei lordese verlust l3-5	relord. nach zielke L3-5 mit deko facettektom bds, transvestektomie	0	2		8	1		2	0
2		0		48	2	109	deg listhese L4/5 mit SKS	dorsale SD L4/5 mit deko bds	0	2		22	1		1	0
2		0		92	3	90	Mehrsegmentale Spinalkanalstenosen L2-5, mit Anterolisthese L2/3	Dekompression durch hemilaminektomie L2-5 links, Spondylodese dorsal mit Cosmic L2/3	0	2		6	1		1	1
2		0		33	2	77	Zentrale Spinalkanalstenose L2/3	Dekompressin über Laminektomie bds. und dorsale Spondlodese L2/3	0	2		9	1		1	1
2		0		59	2	137	Instabilität L2/3 mit NPP und abs SKS	dorsale Korrektur-SD (Legacy, Tezo T) L2/3 mit Deko	0	2		8	1		1	1
2		0		60	2	124	Lytische Spondylolisthese L4/5	Dorsale Spondylodese L4/5 (System Legacy, Medtronic), Laminektommie L4, TLIF-Cage von links, autol. Spongiosa	0	2		7	1		1	1
2		0		77	3	164	Listhese LWK4/5 Stenose L3-5	Sd LWK4/5 und Deko L3-5	0	2		9	1		1	0
1		0		50	2	88	Lytische Spondylolisthese L5/S1	Dorsale Spondylodese L5/S1 (System Legacy, Medtronic) unter Relordosierung, Laminektomie L5, TLIF-Cage von links (TezoT), autologe Spongiosa	0	2		5	1		1	0
1		0		79	3	136	Spondylolisthese L3/4 bei Osteochondrose, hochgradige Spinallkanalstenose l3/4, geringer L2/3	Dorsale relordosierende Korrekturspondylodese L2-L4 (System Legacy, Medtronic) nach Zielke, 2x TLIF-Cage von links	0	2		7	1		2	0
1		0		51	2	111	Listhese LWK4/5 mit 15% Gleitweg	SD LWK4/5	0	2		7	1		1	0
1		0		78	3	185	Lumbale Kyphose bei Osteochondrose L4/5 und Ventrolisthese L5/1 mit hochgradiger SKS L5/S1	Dorsale relordosierende Korrekturspondylodese L4-L1 (System Legacy, Medtronic) nach Zielke, Laminektomie L5, 2xTLIF-Cage von links, autologe Spongiosa	0	2		13	1		2	0
1		0		81	3	96	_x0001_sks L4/5 und L2/3 , Osteochndrose L4/5	dorsale SD ohne intervertebrale fusion. DEko L4/5 und L2/3 von links over the top	0	2		7	1		1	1
1		0		74	3	172	LWK4 # mit hochgr Stenose L3-5 (Z.n.Deko L3/4 von li)	SD L3-5 mit Deko	0	2		34	2	1	2	0
1		0		80	2	157	Ventrolisthese L3/4, Spinalkanalstenose L1-L5	Dorsale Spondylodese L3/4 (System Legacy, Medtronic), Dekompression L1/2, L2/3 und L4/5 von rechts mikrochirurgisch	0	2		14	1		1	0
1		0		77	2	119	listhese L4/5, SKS	dorsales SD	0	2		7	1		1	0
1		0		74	2	76	Spondylolisthese mit konsekutiver Spinalkanalstenose L4/5	Dekompression bds.. und dors. Spondylodese L4/5	0	2		7	1		1	1
1		0		51	2	118	deg listhese und NPP extraforaminal L4/L5 re	SD L4/5 facettektomie bds, seq extraforaminal L4/L5 re	0	2		12	1		1	0
2		0		63	2	104	deg. Listhese und absolute SKS L4/5	dorsale SD	0	2		7	1		1	1
1		0		42	2	81	Spinalkanalstenose L4/5 bri Spondylarthrose	Relordosierende Spondylodese L4/5	0	2		6	1		1	1
1		0		72	2	93	Deg. Olisthese L4/5 mit konsek. SKS	Dors. SD L4/5 (Legacy) & Deko in TLIF (Tezo-T) li	0	2		9	1		1	1
1		0		61	2	131	deg listhese L4/5 mit SKS	SD L4/5 mit deko	0	2		6	1		1	0
2		0		58	2	153	deg. Listhese L4/5	dorsale SD	0	2		6	1		1	0
1		0		71	2	107	Spondylolisthese L4/5 mit hochgradiger Spinalkanalstenose	Dorsale relordosierende Korrekturspondylodese L4/5 (System Legacy, Medtronic) nach Zielke	0	2		8	1		1	1
2		0		66	2	223	OC in seg. Kyphose LWK4/5 p.m.	vdv LWK4/5	0	2		8	1		1	1
1		0		88	2	82	Deg. Instabilität L3-5 mit konsek. SKS	Dors. SD L3-5(Legacy) & Deko in TLIF (Tezo-T), Dekompression bds., Facettektomie L3/4, 4/5 bds, Fettpatchplastik bei Duraläsion und intakter Arachnoidea	0	2		10	1		2	1
1		0		77	3	121	LWK 5 Fraktur, SKS L5/S1	SD L5/S1, Bandscheiben ex. L5/S1 und Knochen trans., Dekompression L5/S1 re.	0	2		18	1		1	1
2		0		50	1	130	Spondylolisthese L5/S1	Dorsale Spondylodese L5/S1 über Laminektomie En-Block	0	2		7	1		1	1
2		0		83	2	142	Listhese LWK4/5 konsek. hochgr. Stenose	SD LWK4/5 Deko über Laminektomie	0	2		6	1		1	0
1		0		45	2	142	lytische Olisthese LWK4/5	SD LWK4/5	0	2		6	1		1	0
1		0		78	2	74	SKS L1/2 bei ältere Fraktur L1,	SD L1/2 (Cosmic), Deko L1/2 bds. Muskelpatchplastik bei Duraleck re	0	2		21	2	1	1	1
2		0		47	2	182	Spondylolisthesis L4/L5 mit SKS	dSD L4/L5, Deko L4/L5 bds, Facettektomie bds.	0	2		7	1		1	0
1		0		76	2	70	Spinalkanalstenose L4/5 und Foraminalstenose L3/4 links mit Tangierung der Nervenwurzel L3	Dorsale dekompression und Spondylodese L4/5, Foraminale Dekompression L3 Wurzel links	0	2		8	1		1	1
1		0		55	2	199	Lumbalskoliose mit Lordoseverlust L-3-5	Relordorsierungs SD L3-5	0	2		6	1		2	1
1		0		79	2	95	SKS BWK12/L1	dorsale SD BWK 12/L1	0	2		9	1		1	1
1		0		78	2	111	Lytische Spondylolisthese L5/S1 mit hochgradiger Foramnestenose L5 bds.	Dorsale SD L5/S1 (Legacy), Laminektomie L5, Neurolyse L5-Wurzel bds., TLIF-Cage von rechts (Tezo-T 8 mm Höhe, Größe S, 5 Grad), posteriore Fusion mit autologer Spongiosa	0	2		7	1		1	0
1		0		49	2	118	Osteochondrose L5/S1, breitbasiger linksbetonter BSV	Dorsale Spondylodese L5/S1 (System Legacy, Medtronic), Relordosierung, TLIF-Cage von links (TezoT, Höhe 10 mm, Größe S, 5 Grad), autologe Spongiosa	0	2		10	1		1	0
1		0		77	3	126	Drehgleiten L4/5, SKS L3-L5	Dorsale Spondylodese L4/5 (System Legacy, Medtronic), Laminektomie L4, Deko L3/4 (Undercutting L3), TLIF-Cage L4/5 von rechts, autologe Spongiosa	0	2		9	1		1	0
1		0		68	2	155	Entlordosierung - Instabilität L3-5	SD L3-5, Deko L3-5 bds	0	2		10	1		2	1
1		0		49	2	102	Spondylolisthese L4/5 mit segmentaler Kyphose und hochgradiger Spinalkanalstenose	Dorsale relordosierende Korrekturspondylodese L4/5 (System Legacy, Medtronic), Transversektomie L4/5, autologe Spongiosa, TLIF-Cage von links (TezoT, 10mm Höhe, 5 Grad, S)	0	2		7	1		1	1
1		0		80	3	191	lumbale Kyphose L3-5	Relordosierungsspondylodese L3-5	0	2		9	1		2	0
1		0		41	2	133	oc lwk4/5	sd lwk4/5 + Deko von li	0	2		5	1		1	0
1		0		54	2	253	OC LWK4-SWK1 mit Lordoseverlust	SD LWK4-SWK1 mit Relordorsierung	0	2		8	1		2	0
1		0		55	2	114	Ventrolisthese L4/5 mit konsekutiver Spinalkanalstenose	Dorsale relordosierende Korrekturspondylodese L4/5 (System Legacy, Medtronic, TezoT von links ), posteriore Fusion mit autologer Spongiosa	0	2		6	1		1	0
1		0		75	2	111	Deg. Instabilität mit konsek. SKS L4/5	Dors. SDL4/5 (Legacy) & Deko in TLIF (Tezo-T) li., Duranaht bei intraop. Duraleck	0	2		8	1	1	1	1
1		0		84	2	68	Deg. Olisthese L4/5 mit SKS	Dors. SD L4/5 (Legacy) & Deko in TLIF (Tezo-T) li, Deko bds.	0	2		9	1		1	1
2		0		68	1	121	deg Listhese L4/5 mit SKS	SD L4/5 deko bds. Telif links.Tetzo, legacy	0	2		5	1		1	1
1		0		84	3	77	Deg. Instabiilität L3/4 mit hochgradiger Spinalkanalstensoe bei Osteochondrose	Dorsale relordosierende Spondylodese (System Legacy, Medtronic) , TLIF-Cage von links (TezoT, 9 mm Höhe, S), autologe Spongiosa	0	2		13	1		1	0
1		0		78	2	73	Spondylolysthese L4/L5, SKS L4/L5	dSD L4/L5 (Legacy) mit Deko L4/L5, Cage Impl. (9 mm S)	0	2		43	5		1	1
1		0		80	3	178	Instabilität L3/4, SKS	SD L3/4, Deko bds, Duranaht Abgang L5 links	0	2		9	1	1	1	1
1		0		72	2	161	deg Listhese L4/5 mit SKS, SKS L3/4	SD L4/5,deko bds. deko L3/4 von re, Durnaht , Muskel patch	0	2		7	1	1	1	0
1		0		58	2	95	spondylolisthese L4/L5 mit hochgradiger SKS	dSD L4/L5 mit Deko, Cageimplantation 9 mm	0	2		5	1		1	1
1		0		72	3	118	OC+NPP LWK2/3 in seg. Kyphose	SD, Deko und Nuc. LWK2/3	0	2		7	1		1	1
1		0		47	2	168	Ventrolisthese L4/5 mit hochgradiger Spinalkanalstenose, Osteochondrose L5/S1 mit vom Bandscheibenfach ausgehender Zyste und Kompression der Nervenwurzel S1 links	Dorsale relordosierende Korrekturspondylodese L4-S1 (System Legacy, Medtronic), 2x TLIF-Cage von links, Entfernung der Zyste L5/S1	0	2		7	1		2	0
2		0		48	1	79	Spondylolisthese L3/L4 mit SKS	dSD L3/L4 (Legacy, Cage 10mm S), Deko L3/L4 bds.	0	2		6	1		1	1
1		0		42	2	91	pseudarthrose L5/S1	dorsale Fusion	0	2		5	1		1	1
2		0		74	3	178	deg Listh L4/5 mit SKS	relord dSD L4/5 Legacy, Tezo t 11, Deko bds	0	2		6	1		1	0
1		0		76	2	149	Instabilität - SKS L4-S1	SD L4-S1	0	2		8	1		2	1
2		0		80	2	138	Instabilität L3/4 mit SKS	dorsale SD L3/4	0	2		5	1		1	0
2		0		82	2	104	Ventrolisthese L4/5 mit konsektutiver Spinalkanalstenose, alte Deckplattenimpression L4	Dorsale relordosierende Korrekturspondylodese L4/5 (System Legacy, Medtronic)	0	2		9	1		1	0
1		0		87	3	101	Listhese L4/5 mit SKS L3-5	SD L4/5 DEko bds, legacsy, Tetzo	0	2		11	1		1	1
1		0		77	2	157	Listhese LWK4/5 (20%Gleitweg)Stenose L3-5	DekoL3-5+SD LWK4/5 + postlat.Fusion Eigenspongiosa	0	2		6	1		1	0
1		0		57	2	142	Lyt. Listhese L3-5, lumale Kyphose	dorsale Relordosierungsspondylodese L3-5	0	2		7	1		2	0
1		0		76	2	121	deg. Listhese L4/5	dorsale SD L4/5	0	2		10	1		1	0
1		0		58	2	149	OC L5/S1	dorsale SD L5/S1	0	2		7	1		1	0
2		0		79	3	85	Spinalkanalstenose bei Thorakaler Metastase Th10	Dekompression und dorsale SD T9-T11	0	2		11	1		2	0
1		0		43	1	114	Spondylolyse L5/S1	dSD L5/S1, Laminektomie	0	2		6	1		1	1
1		0		51	1	148	facettenarthrose mit recezssus stenose L5/S1, mit hochgradige Fußheber und senker parese	SD L5/S1 , deko bds, tetzo , legacy	0	2		10	1		1	0
2		0		78	3	97	Deg. Olisthese L3/4 mit SKS	Dors. SD L3/4(Legacy) & Deko in TLIF (Tezo-T), Deko	0	2		9	1		1	0
2		0		74	3	132	Ventrolisthese L3-L5 mit konsekutiver Spinalkanalstenose	Dorsale relordosierende Korrekturspondylodese L3-L5 (System Legacy, Medtronic) nach Zielke, 2xTLIF-Cage, punktueller Duradefekt L3/4 links	0	2		8	1		2	0
1		0		49	3	113	Instabilität - Spondylolyse L5	Dorsale SD L5-S1 (Krypton)	0	2		8	1		1	1
1		0		63	3	181	Spondylolisthese L5/S1, SKS L5/S1, Z.n. Dekompression L4/L5	dSD L4/S1, Deko L5/S1 bds.	0	2		7	1		2	0
2		0		64	2	111	Spondylolisthese L3/4 mit hochgradiger Spinalkanalstenose	Dorsale Spondylodese L3/4 (System Legacy, Medtronic), TLIF-Cage von links, Tranversektomie, posteriore Fusion mit autologer Spongiosa	0	2		7	1		1	1
1		0		49	2	59	Z.n. ventralem Cage L5/S1	Dorsale Spondylodese (System Legacy, Medtronic) L5/S1	0	2		9	1		1	1
2		0		79	3	108	Osteochondrose L3/4 mit hochgradiger Spinalkanalstenose, lytische Spondylisthese L5/S1	Dorsale Spondylodese L3/4 (System Legacy, Medtronic), TLIF-Cage von links, Transversektomie L3/, posteriore Fusion mit autologer Spongiosa	0	2		13	1		1	1
1		0		52	2	95	deg Listhese L4/5 mit SKS	SD L4/5 und deko bds. Tetzo und Legacy	0	2		7	1		1	1
2		0		83	2	87	osteochnondrose L4/5 facettenarthrose	SD L4/5 ,tetzo, legacy	0	2		8	1		1	1
2		0		49	2	181	Spinalkanalstenose L4/5	Dorsale SD L4/5 (Tlif li.) und Dekompression mit partialle arthrektomie bds	0	2		5	1		1	1
1		0		77	3	74	Degen. Spondylolisthese mit konsekutiver SKS L4/5	Dorsale SD L4/5 mit Tlif (TEZO-T, S, 5Gr), Relordosierung mit Facetektomie bds.	0	2		9	1		1	1
2		0		82	2	183	translation L3 unn L4 mit sks L3-5	sd nach zielke L3-5 mit relord...tetzo und legacy	0	2		9	1		2	0
1		0		79	2	152	deg listhese mit SKS L4/5	SD und deko bds,TEtzo, Legacy	0	2		8	1		1	0
2		0		84	3	189	deg listhese L4/5 mit SKS	SD L4/5 deko bds, duraleck	0	2		9	1		1	1
1		0		79	3	158	Spinaklanalstenose L2-4 und Spondylolisthese L3/4	Dorsale Spondylodese und Dekompression L3/4 und Dekompression L2/3 von rechts	0	2		6	1		1	0
2		0		76	3	191	Kyphose L4/5, SKS, Duraleck	dorsale SD L4/5, Duranaht	0	2		6	1	1	1	0
1		0		50	2	107	lytische Spondylolisthese L3/4	SD L3/4	0	2		7	1		1	1
2		0		43	2	136	osteochondrose und facettenarthrose L5/S1	SD L5/S1, tezo und legacy , telif von re	0	2		6	1		1	0
1		0		48	2	143	Spondylolisthese L4/5, Facettengelenkszyste links	sd L4/5	0	2		7	1		1	1
2		0		74	3	159	SKS L4/L5, Ostochondrose L4/L5, Spondylolisthese L4/L5	dSD L4/L5, Laminektomie und Dekompression L4/L5, Duranaht	0	2		15	1	1	1	0
1		0		66	3	196	lytische Spondylolisthese L5/S1	Repositions-SD L4-S1 in TLIF Technik. Laminektomie L5	0	2		20	2		2	0
1	Woundrevision	1		55	2	140	Instabilität L4-S1, Sponylolyse L5	SD L4-S1 (Legacy) in TLIF L4/5. Laminktomie L5, Deko L4/5 li	0	2		17	2		2	1
1		0		82	3	73	SKS L3-S1, Spondylolisthese L4/5	Dordsale SD L4/5 (TLIF, Small, 9), Dekompression mit Laminotomie (L3/4 und L5/S1 li.) und Laminektomie L4/5	0	2		6	1		1	1
1		0		69	1	119	OC L4/5, Baastrup-Phänomen L1-2	dorsales SD L4/5, Resektion L1/2	0	2		5	1		1	1
1		0		55	2	107	Drehgleiten L4/5 bei Osteochondrose	Dorsale Spondylodese L4/5 (Legacy),TLIF (Tezo-T) von links, Deko L4/5 rechts, autologe Spongiosa	0	2		5	1		1	1
2		0		71	2	131	oc mit seg Kyphose LWK3/4	SD LWK3/4	0	2		5	1		1	0
2		0		78	3	41	LWK 2 Fraktur	dorsale SD L1-3	0	2		8	1		2	1
2		0		59	3	141	instab. L4/5	dorsale SD L4/5	0	2		5	1		1	0
1		0		79	2	68	lumbalskoliose L2/4 mit kons. SKS	Dors. SD L3/4 (Legacy) & Deko in TLIF (Tezo-T) von li, Hemilaminektomie L2/3 von li	0	2		9	1		1	1
1		0		73	3	129	Translation L4/5 mit konsemutiver Spinalkanalstenose L4/5 bei Osteochondrose, SKS L3/4	Dorsale relordosierende Korrekturspondylodese L4/5 (System Legacy, Medtronic), Dekompression L3/4 von rechts, posteriore Fusion mit autologer Spongiosa	0	2		6	1		1	0
1		0		57	2	140	Lyt. Olisthese L5/S1	dorsales SD L5/S1	0	2		7	1		1	0
2		0		77	2	115	listhese LWK3/4	SD LWK3/4	0	2		6	1		1	0
1		0		74	3	120	Translation L3/4, SKS L1-L4 bei multietagerer Osteochondrose	Dorsale Spondylodese L3/4 (System Legacy, Medtronic), Transveresktomie L3/4, Dekompression L1/2 und L2/3 von links, posteriore Fusion mit autologer Spongiosa	0	2		10	1		1	0
1		0		60	2	145	deg. Instailität L4/5, NPP L2/3 li	dorsales SD L4/5, Nukleo L2/3	0	2		7	1		1	0
1		0		77	2	66	Deg.Olisthese L3-5 mit kons. SKS L3/4 bei Z.n.Deko L4/5	Dors. SD L3/4 (Legacy) & Deko in TLIF (Tezo-T) von li	0	2		11	1		1	1
1		0		73	3	130	SKS-Spondylolisthese L4-S1	SD L4-S1 mit posterolateraler Fusion. Hemilaminektomie L5 u. L4 links. Neurolyse L4, L5, S1 links. Punktförmige Duralecks Abgang Nervenwurzel L4 u. L5 (Gelita-Patch)	0	2		7	1	1	2	0
1		0		38	2	130	Spondylolisthese L3/4 Grad 1-2 nach Meyerding bei Spondylolyse L3	Dorsale Spondylodese L3/4 (System Legacy, Medtronic), Laminektomie L3, posteriore Fusion mit autologer Spongiosa	0	2		7	1		1	0
1		0		61	2	149	Lumbale Kyphose bei Osteochondrose L4/5 und degen. InstabilitätL3/4, hochgradige Spinalkanalstenose L3/4, geringer L4/5	Dorsale relordosierende Korrekturspondylodese L3-L5 (System Legacy, Medtronic) nach Zielke	0	2		5	1		2	1
1		0		75	3	102	Spondylolisthese L4/L5 mit begleitende SKS	dSD L4/L5 mit Autologe Knochentransplantation in der Bandscheibenfach.	0	2		8	1		1	0
2		0		68	3	87	Spinalkanalstenose L4/5	dSD L4/5, in TLIF von links	0	2		5	1		1	1
1		0		68	2	156	Pseudospondylolisthese L3/4	dorsale SD L3/4	0	2		6	1		1	0
2		0		61	2	175	Hochgradige SKS L4-S1 bei Osteochondrose, lumbaler Flachrücken	Dorsale relordosierende Korrekturspondylodese L4- S1(System Legacy, Medtronic) nach Zielke, Duranaht L5/S1 dorsal bei punktuellem Duraleck, Muskel-Patch	0	2		7	1	1	2	1
1		0		60	2	125	Spinalkanalstenose,degenerative Instabilität, Facetgelenkarthrose L3-5	Dorsale SD L3-5 mitttels TLIF (9mm S und 11mm S), mit Dekompression und Facetektomie bds.	0	2		8	1		2	1
1		0		84	3	87	L4 Fraktur - Osteoporose	L3-5 SD mit zementierten Schrauben, Kyphoplastie L2 li.	0	2		21	1		2	1
1		0		55	2	161	Lyse L5/S1	SD L5/S1 laminoektomie L5 ,cage	0	2		8	1		1	0
2		0		14	1	105	Spondylolyse L5/S1 mit leichter Listhese	Spondylolyse Repair L5/S1, mit Spongiosaanlagerung vom Beckenkamm rechts	0	2		8	1		1	1
1		0		81	2	73	Spinalkanalstenose L4/5 bein Spondylarthrose	dSD L4/5, TEZO-T 8mm, von links, Deko bds.	0	2		8	1		1	1
1		0		27	1	162	Spondylolyse L5/S1 mit konsekutiver hochgradiger SKS und mediolateraler BSV li.	dorsale SD L5/S1 (Medtronic Legacy), Cage (10 mm s) Laminektomie , Dekompression bds,	0	2		7	1		1	1
1		0		79	2	115	Pseudospondylolisthese L3/4	dorsale SD L3/4	0	2		20	2		1	0
1		0		66	2	99	deg spondylisthese L4/5 mit SKS	SD L4/5 und deko L4/5 bds, facetektomie bds, tetzo von re,	0	2		6	1		1	0
1		0		44	2	100	deg Listhese L4/5	SD L4/5 und deko , Telif von links , Tetz a, Legacy	0	2		7	1		1	0
2		0		58	2	188	Lytische Spondylolisthese L4/L5	dorsale relordorsierungsspondylodese L4-S1.	0	2		8	1		2	0
2		0		44	2	163	Spondylolyse L5-S1	Dorsale SD L5-S1 (TLIF 11mm, S) mit voller Laminektomie L5	0	2		7	1		1	0
1		0		61	2	117	Spondyloarthrose und Lordoseverlüst, und SKS L2/L3 und L3/L4	dorsale Relordorsierungsspondylodese L2-L4, Deko L3/L4 von li, Hemilaminektomie L3 li.	0	2		10	1		2	1
2		0		77	2	85	deg Listh L4/5 mit SKS	dSD relordosiernd L4/5	0	2		7	1		1	1
1		0		70	2	117	Spondylolisthese L4/L5 mit SKS L4/L5 und Gelenkzyste L4/L5	dSD L4/L5 und Deko von li und Cysten ex.	0	2		6	1		1	1
1		0		55	2	110	Kyphotische Ventrolisthese L4/5, Osteochondrose L5/S1	Dorsale relordosierende Korrekturspondylodese L4-S1 (System Legacy, Medtronic) nach Zielke	0	2		6	1		2	1
1		0		76	2	129	Degen. Instabilität L4/5, hochgradige Spinalkanalstenose	Dors. Relordosierungs-SD L4/5, (Legacy)& Deko, Eigenspongiosa	0	2		10	1		1	1
2		0		82	2	137	Lumbale Kyphose L3-5, degen. Spondylolisthese mit konsekutiver hochgradiger SKS	Relordosierung nach Zielke, dekompresion mit Hemilaminektiomie bds, dorsale SD l3-5	0	2		6	1		2	1
1		0		85	2	122	deg Kyphose bei Spondylolisthe L3/4 und L4/5 und abs SKS, kleine intaop Duraläsion	Dorsale relordosierende Korrekturspondylodese L3-5 (System Legacy, Medtronic) nach Zielke, Abdecken einer kl intraop Duraläsion mit Eigenfettgewebe	0	2		13	1	1	2	1
2		0		58	3	123	Epidurale Metastase, Infiltration Dura-Abgang Nervenwurzel Th8 rechts. Zn Schilddrüsen Ca Th8	SD Th7-9. Laminektomie Th8. Tumordebulging. Gelitta-Duraplastik bei Duraleck Abgang Nervenwurzel Th8 re. Rhizotomie Th8 re	0	2		8	1	1	2	0
1		0		51	2	114	Spondylolisthese L3/4	dorsale SD L3/4	0	2		6	1		1	1
2		0		74	2	112	deg. Listhese L4/5, SKS L3/4	dorsale SD L4/5, Deko L3/4 von li	0	2		5	1		1	1
1		0		43	3	109	Osteochondrose L5/S1 mit Foramenstenose L5/S1 rechts	Dorsale Spondylodese L5/S1 (System Legacy, Medtronic); Transversektomie, posteriore Fusion mit autologer Spongiosa	0	2		5	1		1	1
2		0		68	3	195	kyphose und Translation nach Fraktur L3, L4, hochgradige SKS L3/4	Relordosierungsspondylodese L2-4	0	2		13	2	1	2	0
2		0		83	3	99	Dekenerative Listhese L4/L5 mit SKS	dSD L4/L5 mit Deko von re., Fettpatchplastik von li.	0	2		8	1	1	1	1
1		0		70	3	45	Osteochondrose L5/S1 mit SKS	dSD L5/S1 mit Deko von li.	0	2		7	1		1	1
1		0		61	3	52	deg. listhese L4/5	dorsale SD L4/5	0	2		10	2		1	0
1		0		79	3	77	Degenerative Spondylisthese L4/L5 mit SKS bds.	dSD L4/Ld und Deko bds.	0	2		7	1		1	1
1		0		59	2	101	OC LWK3/4	SD LWK3/4	0	2		8	1		1	0
1		0		65	2	132	OC mit Stenose LWK3-5	SD LWK3-5 und Deko	0	2		8	1		2	0
1		0		56	2	108	deg. Listhese L4/5	dorsale SD L4/5	0	2		6	1		1	1
1		0		75	2	107	deg Listhese L4/5 mit SKS	SD L4/5 mit deko, Tetzo, medtronic legacy	0	2		6	1		1	1
2		0		57	1	92	Osteochondrose L4/5	Dorsale Spondylodese L4/5 (System Legacy, Medtronic), Transversektomie, TLIF-Cage von links (TezoT 11 mm, Größe S), autologe Spongiosa, Relordosierung	0	2		5	1		1	1
2		0		53	2	219	Listhese LWK4/5, Spondylolyse LWK5 (Z.n. Nuc. LWK4/5 re)	SD LWK4-SWK1	0	2		22	2		2	0
2		0		47	2	144	lytische Spondylolisthese L5/S1	dorsale SD L5/s1	0	2		7	1		1	0
2		0		84	2	147	Drehgleiten l4/5 mit konsek. SKS L2-5	dSD L4/5, Deko L2-4 v re	0	2		8	1		1	1
1		0		59	2	86	SKS L4/5, Degen. instabiität und Spondylolisthese	Dorsale SD und Deko L4/5 mit Ponte Osteotomies bds, Laminektomie bds. und Relordosierung	0	2		7	1		1	1
1		0		62	2	163	deg Listhese mit abs SKS L4/5 und großem intralaminären Knochentumor	dSD L4/5 mit Relordosierung (tezo T, Legacy) und Laminektomie L4	0	2		7	1		1	1
1		0		53	3	124	osteochondrose L4/5, verkalkte medial NPP L4/5 bei skralisation der LWK5	SD L4/5, Laminoektomie L4, intervertebrale Cage tetzo p,	0	2		6	1		1	0
2		0		53	2	193	lytische Olisthese LWk5/SWK1	SD LWK5/SWK1	0	2		6	1	1	1	0
1		0		75	3	118	Spondylolisthese L4/5 mit konsek. SK Enge	dSD L4/5, Dekompression bds, Facettektomie bds, Duranaht bei iatrogenem Duraleck	0	2		8	1	1	1	1
1		0		72	3	124	lyt. Listhese L4/5	dorsale SD L4/5	0	2		11	1		1	0
1		0		63	2	151	lumbale Kyphose L3-5	Relordosierungsspondylodese L3-5	0	2		12	1		2	0
1		0		69	3	162	Spinalkanlastenose L4-S1 mit degenrativer Instabiltät, Zyste L4-5	Dorsale SD L4-S1, relordosierung nach Zielke	0	2		11	1		2	1
2		0		67	2	164	segementale kyphose L2-4 bei lordoseverlust, osteochnodrose L2/3 , translation L3 , SKS L3/4	Relordisierung L2-4, deko nds , Tranvsekektomie , Facettekromie bds in hoöhe L2/3 und L3/4 , SD L2-4 intervertberalen cages	0	2		6	1		2	0
1		0		78	3	90	Deckplattenimpressionsfraktur Th12 mit Kyphose im thorakolumbalen Übergang	Dorsale Spondylodese Th11-L1 (System Legacy, Medtronic), Kyphoplastie Th12 bds., Zementaugmentation Th11 und L1, posteriore Fusion mit Actifuse	0	2		9	1		2	1
2		0		66	2	121	metast Prostata-Ca, osteolyt. Metastase LwK3	dorsale SD L2-4, Laminektomie	0	2		9	1		2	0
1		0		76	2	82	BWK 4 Fraktur mit Kyphose	dorsale KorrekturSD Th3-5 (legacy) mit posterolat Fusion	0	2		18	1		2	0
1		0		76	3	219	OC LWK4/5 p.m.mit Drehgleiten, Stenose LWK3-SWK1 li betont	SD LWK4/5,Deko L3-SWK1	0	2		9	1		1	0
1		0		61	2	181	Listhese L3-5 mit segment. Kyphose und Lordoseverlust	Relordorsierungs SD L3-5 n. Zielke	0	2		7	1		2	0
2		0		67	2	107	Lytische Spondylolisthese L5/S1	dorsale Spondylodese L5/S1 mit Laminektomie, Reposition, posterolaterale Fusion bds._x0001_Wunde geklebt	0	2		7	1		1	1
1		0		76	2	168	Spinalkanalstenose L3/4 und L4/5, Osteochondrose L4/5, Retrolisthese L3/4	Dorsale Spondylodese L3-L5 (System Legacy, Medtronic), TLIF-Cage L3/4 und L4/5 von links, PCO L3/4 und L4/5 (posterior column osteotomy)	0	2		16	1		2	0
2		0		64	2	118	deg. Listhese mit absoluter SKS L4/5	dorsae SD L4/5	0	2		5	1		1	1
1		0		60	3	113	Degenerative Instabilität L3-5 mit konsekutiver Spinalkanalstenose	Relordosierung SD L3-5 mittels TLIF (9mm und 8mm, S) nach Zielke mit Dekompression.	0	2		9	1		2	1
1		0		70	2	93	deg Listh L4/5 mit abs SKS	dSD L4/5 relordosierend(Legacy, Tezo t)	0	2		5	1		1	1
1		0		78	2	167	treppen phänoman L4-S1 mit SKS	dorsale SD L4-S1 Telif von links deko von links , medtronic, tetzo ulrich	0	2		6	1		2	0
1		0		67	2	50	degn. Listhese L3/4	dSD L3/4	0	2		9	1		1	1
1		0		43	2	192	lytische Spondylolisthese L5/S1, Instabilität L4/5	Repositions-SD L4-S1 in TLIF Technik	0	2		7	1		2	0
1		0		66	2	61	Degenrative Spondylolisthese L4/5 mit konsekutiver Spinalkanalstenose	Dorsale SD L4/5 mittels TLIF (S, 8 mm) mit Dekompression	0	2		8	1		1	1
2		0		77	3	105	Retrolisthese L4/5 mit Spondylarthrose bei Osteochondrose	Dorsale relordosierende Korrekturspondylodese L4/5 (System Legacy, Medtronic), posteriore Fusion mit autologer Spongiosa, TLIF-Cage von links	0	2		6	1		1	1
1		0		79	2	99	spondylolisthese L4/5 mit SKS	SD L4/5 , und deko bds, tetzo , legacy	0	2		8	1		1	1
1		0		76	3	151	listhese und SKS L4/5 , NPP L3/4 re	SD L4/5 DEko bds, intervertebral , legacy, tetzo ulrich, sequester ektomie L3/4 re mikrochiruegisch	0	2		14	1		1	1
1		0		78	2	126	Listhese LWK4/5 mit Stenose	SD L4/5 mit Deko	0	2		8	1		1	0
1		0		65	2	137	Deg. Instabilität L4/5 konsekutive SKS	SD L4-S1 (Legacy, TLIF Cage), Deko L4/5 bds	0	2		6	1		2	1
1		0		81	3	135	Lyse L5 mit Spondylolisthese L5/S1 Grad 3-4 nach Meyerding	dorsale Spondylodese L5/S1, Reposition, Dekompression	0	2		8	1		1	1
1		0		67	2	132	deg. Listhese L4/5, SKS L3-5	dorslae SD L4/5 , Deko L3-5	0	2		7	1		1	1
1		0		81	2	93	SKS L2-S1, Retrolisthese und Translation L3/4	dorsale Spondylodese L3/4, Dekompression L2-S1	0	2		9	1		1	1
1		0		69	2	52	Degenerative Lumbalskoliose mit Rotation L3 über L4 mit SKS	dorsale Spondylodese L3/4 mit Dekompression	0	2		7	1		1	1
2		0		70	2	112	Degenerative Spondylolisthese L4/5 mit konsekutiver absoluter Spinalkanalstenose	dorsale Spondylodese L4/5 mit Dekompression	0	2		6	1		1	1
1		0		86	2	102	Degenerative Skoliose mit segmentaler Instabilität L3/4, SKS L3/4 und L5/S1	dorsale Spondylodese L3/4, Dekompression L3/4 und L5/S1 von links	0	2		9	1		1	1
2		0		64	2	125	instabilität L4/5	dorsale SD L4/5	0	2		5	1		1	1
2		0		68	3	210	Spndolyse L4	SD L3-5, intrakorperell , Pelif L4/5 und Telif L3/4, laminoektomie L4	0	2		6	1		2	0
1		0		66	2	77	Kyphotische Instabilität L4/5	Dorsale Spondylodese (System Legacy, Medtronic) L4/5 mit dorsoventraler Korrektur der Kyphose	0	2		5	1		1	1
1		0		72	2	82	deg. listhese L4/5	dorsale SD L4/5	0	2		7	1		1	1
1		0		62	2	188	lumbale Kyphose, hochgradige SKS L3-5	Relordosierungsspondylodese L3-5	0	2		9	1		2	0
1		0		59	2	142	Degenerative SPondylolisthese L4/5 mit konsekutiver SKS L3-5	Dorsale SD L3/4 mittesl interkor. Fusion und mikrochirurg. Deko L3/4 re.	0	2		7	1		1	1
1		0		73	3	192	Listhese LWK4/5	Sd LWK4/5 mit Deko	0	2		30	2		1	0
2		0		62	2	86	Drehgleiten L4	SD L4/5 mit deko bds, leqacy, tetzo t	0	2		4	1		1	1
2		0		67	2	168	Degenrative Spondylolisthese L4-S1 (Treppenphainomen) mit Spinalkanalstenose	Relordosierung (30 präop Vs 45 postop) Dorsale SD L4-S1 mit Dekompression L4/5 und L5/S1 von re., mit Adhäsiolyse, Neurolyse, Foraminotomie der korespondierten Wurzeln	0	2		7	1		2	0
1		0		72	2	62	Ventrolisthese Meyerding Grad II L5/S1 (6 LWK) mit konsekutiver SKS	dorsale Spondylodese L5/S1 (6 LWK) (Legacy, Mdtronic, kanulierte Schrauben L5 und zementiert), Dekompression L5/S1 bds.	0	2		13	2		1	1
1		0		59	3	215	lumbale Kyphose L3-5	Relordosierung L3-5	0	2		10	1		2	0
1		0		48	2	79	Ventrolisthese Meyerding Grad II mit konsekutiver SKS L4/L5	dorslae Spondylodese L4/L5 (Medtronic, Legacy, Tezo Cage 9 mm) und Dekompression L4/L5 bds	0	2		5	1		1	1
2		0		59	2	126	Spondylolisthese L3/L4 mit begleitender hochgradiger SKS	dorsale Spondylodese (Legacy Medtronic, Tezo Cage 10 mm) L3/L4 und Dekompression bds.	0	2		6	1		1	1
1		0		81	2	96	Ventrolisthese nach Meyerding Grad II L4/L5 (bei 6 LWK) mit kosekutiver hochgradiger SKS	dorsale Spondylodese L4/L5 (bei 6 LWK) Legacy Medtronic und Tezo Cage 9 mm , Dekompression L4/L5 von bds.	0	2		5	1	1	1	1
1		0		73	2	125	Deg. Listhese L4/5 mit SKS	Relordosierung L4/5	0	2		5	1		1	1
1		0		53	2	115	Spondylolisthese-Kyphose L4/5	RepositionsSD L4/5 (Legacy, interkorporell TLIF Cage Tezo-T)	0	2		5	1		1	1
2		0		53	3	203	Lytische Olisthese_x0001_Osteochondrose, zweitletzte Etage	dorsale relordisierung nach zielke , totale Facettekktomie L4/5 und L5/S1 bds, Transvestektomie L4/5 und L5/S1 , Deko bds L4-S1, venrtale Releas, legacy und tetzo pt	0	2		6	1		2	0
1		0		56	2	97	relative listhese L4/5 , Gelenkzyste L4/5 links, SKS L4/5	dSD L4/5, Deko bds, totale Facettektomie bds, tetzo pt , Legacy	0	2		5	1		1	1
1		0		72	3	161	Listhese LWK4/5 mit konsekutiver Spinalkanalstenose	SD und Deko Lwk4/5	0	2		7	1		1	0
2		0		80	3	223	Listhese LWK4/5 und Stenose	SD LWK4/5 und Deko über Wiltse Zugang bds	0	2		6	1		1	1
2		0		83	3	108	meianer NPP , mit traslation L2	dorsale SD L2/3 DEko bds, intervertebrale Twetzo mit telif von re	0	2		7	1		1	1
1		0		72	3	92	Degen. Instabilität L3/4 mit hochgradiger Spinalkanalstenose	Dorsale Spondylodese L3/4 (System Legacy, Medtronic), TLIF-Cage von links, Transversektomie, Relordosierung	0	2		8	1		1	1
1		0		80	2	117	Segmentale Kyphose L4/5 bei Spondylolisthese mit hochgradiger Spinalkanalstenose nach Dekompression L4/5 vor 30 Jahren	Dorsale relordosierende Korrekturspondylodese L4/5 (System Legacy, Medtronic), TLIF-Cage von links, Korrektur von präoperativer Kyphose 7Grad auf intraoperativ 20 Grad Lordose	0	2		5	1		1	1
1		0		74	3	128	Treppenphänomen L3-5 mit hochgradiger Spinalkanalstenose	dorsale Spondylodese L3-5, Dekompression L3-5	0	2		16	1		2	1
1		0		83	2	147	Degenerative Spondylolisthese L4/5 mit Drehgleiten, absolute SKS L2-5_x0001_altes Duraleck mit freiliegendem, verklebtem Faszikel bei Z.n. Deko L4/5	dorsale Spondylodese L4/5, Dekompression L2-5 von links in mikrochirurgischer Technik, Duranaht und Fettpatchplastik auf Höhe L4/5	0	2		19	1	1	1	1
1		0		69	2	63	Spondylolisthese L4/5 mit konsekutiver hochgradiger Spinalkanalstenose	dorsale Spondylodese L4/5, Dekompression	0	2		6	1		1	1
1		0		75	2	79	deg. Listhese L4/5	dorsale SD L4/5	0	2		7	1		1	1
2		0		73	3	99	Ventrolisthese L4/Ld mit konsekutiver hochgradiger SKS L4/L5	dorsale Spondylodese L4/L5 (Fa. Medtronic Sys. Legacy, Tezo Cage 10 mm) mit Dekompression L4/L5 von bds.	0	2		6	1		1	1
1		0		53	2	112	Spondylolyse L5 bds.	Dorsale SD L5/S1 (Legacy), Laminektomie L5 & Deko, TLIF-Cage (Tezo-T) von links	0	2		13	2		1	0
2		0		63	3	135	deg Spondylolisthese L4/5, SKS L3-5	SD L4/5 (Ennovate MIS, interkorporell TLIF Tezo-T), Deko L3-5 li over the top. Über Wiltse Zugang bds.	0	2		8	1		1	1
2		0		38	2	199	Spondylolsye L5, Osteochondrose L4/5	Relordisierungssspondy nach zielke , Laminoektomie L5, Totale fecttektomie L4/ L5/S1 bds, Deko L4-S1 bds, transvestekotmie, intrakorpolerre usion mittels tetzo L4/5 und L5/S1	0	2		5	1		2	0
1		0		68	2	91	Spondylolisthese L3-5 mit Gleitweg von 20%	dorsale Spondylodese L3-5, Dekompression L3-5	0	2		7	1		2	1
1		0		42	2	128	Osteochondrose L4/5	dors SD L4/5 (Legacy, interkorporell Tezo-T), bds. Facettektomie	0	2		4	1		1	1
1		0		78	2	58	Spondylolyse L3/4	Dorsale Spondylodese L3/4, TLIF von links	0	2		14	2		1	1
2		0		64	2	144	lyt.Olisthese L4/5	dorsale SD L4/5	0	2		5	1		1	1
1		0		78	2	39	Pseudospondylilisthese L3/4	dorsale SD L3/4	0	2		19	1	1	1	0
2		0		63	2	169	lytische Olisthese L5/S1	dorsale SD L5/S!	0	2		6	1		1	1
1		0		74	3	90	Degeneratve lumbale Skoliose mit lumbale Kyphose	Dorsale SD L4/5 (Legacy, Medtronic) mit interkorp. TLI-Fusion (mittels Tezo-T Cages, Fa Ulrich) und dorsaventrale Korrektur mit Transversektomies bds.Arachnoidal Duraleck - Fettpatchplastik	0	2		16	2		1	1
1		0		80	2	168	SpodzloListhese L4/5 , SKS L2..L5	dSD L4/5, Deko L2...L5 von rechts. intrakorperelle Fusion Tetyo t cage, Legacz	0	2		6	1		1	1
1		0		72	2	110	degenerative Ventrolisthese L4/L5 grad II nach Meyerding mit konsekutiver hochgrsdiger SKS L4/L5 bds.	dorsale Spondylodese L4/L5 (Fa. Medtronic,System Legacy, Tezo T Cage 9 mm), Dekompression von bds.	0	2		6	1		1	1
1		0		77	2	79		Dorsale SD L4/5, Dekompression bds,	0	2		5	1		1	0
1		0		62	3	133	Treppenphänomen L3-L5 mit hochgradiger SKS L3-L5 und massiver mediolateraler BSV L4/L5 re.	dorsale relordosierungsspondylodese L3-L5 (Fa. Medtronic System Legacy ,9 und 10 mm Tezo-T Cage) und Dekom1pression L3-L5 bds, Sequestrektomie L4/L5 von re.	0	2		6	1		2	0
1		0		72	3	91	Kyphose bei L3-Fraktur	Relodrosierungsspondylodese L1-3	0	2		13	2		2	0
1		0		71	2	80	Ventrolysthese L3/L4 Grad II nach Meyerding mit konsekutiver hochgradiger Spinalkanalstenose L3/L4 re	perkutane dorsale Spondylodese (über Wilke Zugang) L3/L4 mit Dekompression von re.	0	2		5	1		1	1
2		0		81	3	125	zentrale Spinalkanalstenose L1/2 und L4/5 bei Osteochondrose	dSD L4/5 in TLIF Technik von links, Deko L1/2 von li und over-the-Top zur Gegenseite	0	2		9	1		1	1
1		0		61	2	71	SKS L4/5	dSD L4/5 TLIF(Legacy, Tezo), Laminektomie, Deko	1	2		7	1		1	1
1		0		81	3	123	Spondylolisthese L3/4 mit hochgradiger Spinalkanalstenose bei erheblicher linkskonvexer Lumbalskoliose und kompletter Ankylose der übrigen LWS-Segment	Dorsale Spondylodese L3/4, (Legacy), Transversektomie und dorsoventrale Korrektur, TLIFCage von links (Tezo-T)	1	2		8	1		1	0
1		0		73	2	73	Fraktur L1	dorsale SD BWK 12-LWK 2	0	2		6	1		2	1
1		0		73	2	64	Ventrolisthese Grad II nach Meyerding L4/L5 mit konsekotiver hochgradiger SKS.	dorsale Spondylodese L4/L5 (Fa. Medtronic, Sys. Legacy) Cage 7 mm, Dekompression L4/L5 bds.	1	2		6	1		1	1
2		0		48	2	212	dorsale Kyphose, Lyt.Listhese L4/5, Lyse li L5/S1, Duraleck punktförmig	Relordosierung L4-S1, Naht	0	2		6	1	1	2	0
1		0		45	2	195	spondylolyse L5, Spondylolisthese L5/s1, Osteochondrose L4/L5, hochgradiger SKS L4-S1 bds.	dorsale Relordorsierungsspondylodese L4-S1 (Fa. Medtronic, System Legacy, 2x intervertebrales Cage 8 und 9mm), Laminektomie L5, Dekompression L4-S1 bds., Fettpatch bei Duraleck	0	2		7	1	1	2	0
2		0		81	3	71	Listhese LWK4/5 n. VorOP mit Deko	SD LWK 4/5 mit Deko	1	2		6	1		1	1
1		0		70	2	128	Spondylolisthese L4/5, lumbaler Flachrücke, Sponanfusion L5/S1	Dorsale RelordosierungsSD L4/5 (Solera, Medtronic), PCO (posterir column osteotomy), TLIF (Tezo-T Höhe 9 mm) von links, posteriore Anlagerung autologe Spongiosa	0	2		14	1		1	1
1		0		67	2	196	sekundäre Kyphose bei deg Listhese L3/4/5 translation L3 und L4 , sks L2-5	dorsale relordisierung nach Zielke L3-5, -facettektomie L3/4 L4/5 bds, Transvestektomie L3/4 und L4/5 , Deko L2-5 bds. Legacy, Fa Ulrich	1	2		7	1		2	0
2		0		59	2	128	OC LWK4 mit hochgradiger Spinalkanalstenose	SD LWK4/5 mit Laminektomie	0	2		5	1		1	0
1		0		80	3	122	Degenerative Instabilität mit erheblicher Translation L2/3, alter verkalkter mediolateraler NPP L2/3 links mit SKS	dorsale Spondylodese L2/3 + Dekompression	0	2		5	1		1	1
1		0		64	2	117	Ventrolisthese L4/L5 mit konsekutiver hochgradiger SKS L4/L5	dorsale Spondylodese L4/L5 (Medtronic Legacy, Cage 9mm) und Dekompression L4/L5 von li und Over the Top	0	2		6	1		1	1
1		0		82	2	103	Ventrlisthese L4/5 mit hochgradiger konsekutiver Spinalkanalstenose, Spontanfusion L5/S1, lumbaler Flachrücken	Dorsale relordosierende Spondylodese, dorsoventrale Korrektur (System Legacy, Medtronic) nach Zielke, TLIF-Cage vn links, PCO, Anlagerung von autologer Spongiosa	0	2		8	1		1	1
2		0		56	3	180	Ventrolisthese L4/L5 mit konsekutiver hochgradiger SKS	dSD L4/L5 und Dekompression von bds.	1	2		8	1		1	0
1		0		81	3	92	Hinterkantendislokation LWK 2 nach intraspinal nach Sturz beiZ.n. Kyphoplastie LWK 2 (extern) bei LWK 2 Fraktur	dorsale Instrumentierung L1 - L3, Dekompression L1-3	0	2		9	1		2	1
2		0		73	3	60	Fraktur LWK 1	Dorsale perkutane Instrumentierung Th12-L2 (Ennovate, Fa. Aesculap)	1	2		24	2		2	1
2		0		75	2	154	Ventrolisthese L4/L5 mit konsekutiver hochgradiger SKS	dorsale Spondylodese (Sy. Legacy, Fa. Medtronic), Interkorporelle Fusion mittels Tezo T Cage 10 mm (Fa. Ulrich), Autologe Spongiosa Implantation, Dekompression von bds.	0	2		7	1		1	0
2		0		80	2	69	Spinalkanalstenose L3-5, Osteochondrose L3/4	dSD L3/4, Dekompression L4/5 über Hämilaminektomie von rechts	1	2		5	1		1	1
1		0		80	2	116	Listhese LWK4/5 mit konsekutiver Spinalkanalstenose und segmentalem Lordoseverlust	SD LWK4/5 mit Deko und dorso-ventraler Korrektur	0	2		5	1		1	1
1		0		65	2	73	Facettengelenkszyste L4/5 rechts, Anterolisthese L4/5	dorsale Spondylodese L4/5 + Dekompression/Zystenexstirpation	1	2		6	1		1	1
2		0		46	2	156	Listhese LWK4/5 mit seg. Lordoseverlust	Spondylodese LWK4/5 mit dorsoventraler Korrektur (von 16,2 auf 23,7 Grad) und Dekompression	0	2		5	1		1	1
1		0		72	3	148	deg. Listhese L4/5	drsoventrale Korrekturspondylodese	0	2		14	2		1	0
1		0		45	2	95	Spondylolisthese L5/S1 Grad 1 nach Meyerding bei Spondylolyse L5 bds.	Spondylodese L5/S1 mit dorsoventraler Korrektur, dorsale Instrukentierung L5/S1 (Legacy, Titan, Fa. Medtronic), Laminektomie L5, Foraminotomie L5 bds., TLIF-Cage von links (tezoT, Titan, Fa. Ulrich), Relordosierung, autologe Spongiosa	0	2		6	1		1	1
1		0		79	3	91	Segmentinstabilität LWK3/4 mit Synovialcyste re und Spinalkanalstenose	SD LWK3/4 mit Deko	1	2		8	1		1	1
2		0		71	2	138	Ventrolisthese L5/S1 mit hochgradiger Spinalkanalstensoe und Formanestensoe L5 bes., Spondylolyse L5 rechts, Spinalkanalstenose L4/5	Dorsale relordosierende Korrekturspondylodese L4-S1 (System Legacy, Medtronic) nach Zielke, Neurolyse L5-Wurzel bds., 2x TLIF-Cage von links, Laminektomie L5	1	1		15	2		2	0
1		0		82	3	105	Bandscheibenvorfall L4/5 rechtsseitig bei mehrsegmentaler Osteochondrose, Frische LWK 2 Fraktur	dSD L4/5 (Solera), Dekompression, Fettpatchplastik. Perkutane biportale Ballonkyphoplastie LWK 2.	1	2		7	1	1	1	0
1		0		64	2	99	spondylolisthesesis L4/5 mit SKS	dSD mit dorsoventrale korrektur L4/5 , Facettektomie L4/5 bds, Deko bds, Transvestektomie , intercorperrele Fusion L4/5 ( tetzo pt, Ulrich, ) medtronic legacy	1	2		6	1		1	1
1		0		59	2	71	Deg. Listhese L4/5, Drehgleiten, konsekutive SKS L4/5	dorsoventrale Korrektur L4/5	1	2		6	1		1	1
2		0		79	3	160	sekundäre Kyphose L3-5, Spondylolisthesis - L3-5 mit SKS	relordisierung SD L3-5 nach Zielke , transvestektomie L3/4 und L4/5, Facettektomie bds + Deko bds L3/4 und L4/5 , interkorperrel mit Tezo pt, Legacy medtronic, lordose winkel präop 32 intraop 44 grad	0	2		7	1		2	0
2		0		63	3	157	Ventrolisthese L4/5 mit erheblicher Spondylarthrose und konsekutiver hochgradiger Spinalkanalstenose L4/5	Spondylodese L4/5 mit dorsoventraler Korrektur, dorsale Instrumentierung (Legacy, Titan, Fa. Medtronic), Transversektomie mit vollständiger Resektion der Facettengelenke und des Ligamentum flavum beidseits, ventrales Release, TLIF-Cage (tezoT, Titan, Fa.	1	2		19	1		1	0
2		0		66	3	120	Degenerative Instabilität LWK4/5 mit 15% Listhese und seg. Kyphose von 2,3 Grad	Dorso-ventrake Korrekturspondylodese LWK4/5 mit Dekompression (post OP Lordose 7,9 Grad)	0	2		7	1		1	0
1		0		77	3	82	Frischere Fraktur Th12, alte Wirbelkörperfrakturen L2, L3 und L4	Perkutan-minimalinvasive dorsale Instrumentierung Th11/Th12/L1 (Solera MIS, Titan, Fa. Medtronic)	1	2		7	1		2	1
1		0		75	3	208	skeundäre Kyphose L3-5, spondoylolisthese L4/5 mit SKS L3-5	relordisierung SD nach Zielkre L3-5, intercorperelle fusion mittels cages tetzo pt, Facettektomie L3/4 u L4/5 bds, Laminoektomie L4, Deko L3/4 und L4/5 , medtronic legacy , präop Lordose 30 intraop 54	1	2		8	1		2	0
1		0		71	2	108	deg. Spondylolisthese L4/5	dorsoventrale Korrektur	1	2		6	1		1	1
1		0		66	2	144	Degenerative Lumbalskoliose,Spondylolyse L5	postolaterale fusion L5/S1 , Laminoektomie L5, medtronic legacy	1	2		7	1		1	0
1		0		80	3	200	lumbale Kyphose, hochgradige SKS L4-S1	Relordosierungsspondylodese L4-S1	1	2		9	1		2	0
2		0		72	2	60	Degenerative Instabilität L4/5 bei Z.n. Deko	dorsale Spondylodese L4/5, dorso-ventrale Korrektur, Dekompression, Facettektomie L4/5 bds., TLIF cage	1	2		6	1		1	1
1		0		80	3	212	Zentrale Spinalkanalstenosen L2-4, eingeblutete epidurale Zyste mit Althämatom Höhe L2-4, intraoperative Duraläsion L2/3 links.	Dorsale korrekturspondylodese L2-4, Knöcherne Dekompression, Laminektomie LWK3, Entfernung des Hämatom, Duranaht, Fatpatch-Plastik	0	2		26	1	1	2	1
2		0		81	2	206	Spinalkanalstenose Degenerative Instabilität Lumbale Kyphose	Dorsale relordosierende Korrekturspondylodese (System Legacy, Medtronic) nach Zielke L3-5	1	2		7	1		2	0
2		0		70	2	49	LWK 1 Fraktur	Dorsale perkutane minimalinvasive Instrumentierung (Solera, Medtronic) Th12-L2	0	2		9	1		2	1
1		0		65	2	62	Spondylolisthese L4/5 mit kons. SKS L4/5 und SKS L3/4	Dorsale Spondylodese L4/5, dorsale Instrumentierung (System Legacy, Medtronic), TLIF-Cage (tezoT, Titan, Fa. Ulrich), Dekompression L3-5, Facettektomie L4/5 bds., posteriore Anlagerung von autologer Spongiosa	1	2		9	1		1	1
1		0		79	2	161	sekundäre Kyphose , spondylolisthese L3-L5 mit SKS	Relordisierungsspondylodese nach Zielke L3-L5 , Facettektomie ds, Deko bds L3-5, Transvesektomie L3/4/5 .tetzo pt , legacy medtronic	1	2		7	1		2	0
1		0		67	2	153	Spondylolyse L4 und L5 mit entsprechende gleitwirbel und Kyphose	relordisierungss SD L4-S1 , Laminoektomie bds, Facettektomie L4/5 und L5/S1 bds, interkorperelle fusion mit tetzo pt in beiden höhe, dorsale insturmentierung Legacy medtronic	1	2		7	1		2	0
2		0		25	2	213	einseitige Lyse L5/S1 li, intrforaminaler NPP, doppelt angelegte S1 -wurzel re	dorsoventrale RelordosierungL5/s1	1	2		6	1		1	0
2		0		84	3	162	sekundäre Kyphose bei tranlation L3, gleitwirbel L4/5	relordisierungs SD nach Zielke L3-5 , faceetektomie bds, transvestektomie , Deko bds L3-5. tetzo pt , intraoperatives Duraleck , L4/5 re mit -duranaht Muskelpatch versorgt	1	2		16	1	1	2	0
1		0		72	3	146	Sekundäre Kyphose bei TreppenPhenomän L3-5 , SKS L2-L5	poly segementale Relordisierung nach Zielke L3-L5 , Deko bds L3-L5, Facettektomie L3/4/5 bds , Transvestektomie L3/4/5, Deko von li L2/3. tetzo pt , Legacy medtronic	1	2		7	1		2	0
2		0		61	2	81	deg. Spondylolisthese L4/5	Dors. LordosierungsSD … (Legacy) & Deko in TLIF (Tezo-T) L4/5	1	2		6	1		1	1
1		0		78	3	139	Osteochondrose L4/5, mit zentrale Spinalkanalstenose	Dorsale Spondylodese L4/5 mit ventrodorsalem Release, Facetektomie links, T-LIF Cage von links	1	2		4	1		1	1
1		0		79	3	125	Skoliose L4/5 mit SKS	dorsale SD L4/5, Deko L3-5 re	1	2		6	1		1	1
2		0		76	2	112	Spinalkanalstenose L4/5, Facettenarthrose L4/5, positiver Infiltrationstest	dorsale Spondylodese L4/5, ventrodorsales Release, Facetektomie L4/5 bds., Dekompression bds.	1	2		6	1		1	1
1		0		82	3	104	Ventrolisthese L4/L5 Grad 2 nach Meyerding, Osteochondrose, Konsekutiver SKS	dorsale Spondylodese L4 /L5 (Innovate, Aesculap) durch Wiltse Zugang, Interkorporelle Fusion mittels Cage, Dekompression von re.	1	2		6	1		1	1
2		0		50	2	148	Spondylolyse L5 mit Ventrolisthese L5/S1, erhebliche Spondylarthrose L4/5 bei segmenetaler Hyperlordose L4/5	Dorsale relordosierende Korrekturspondylodese L4-S1 nach Zielke, dorsale Instrumentierung L4-S1 (Legacy, Titan, Fa. Medtronic), Transversektomie mit vollständiger Resektion der Facettengelenke und des Ligamentum flavum L4/5 beidseits, Laminektomie L5, ven	1	2		7	1		2	0
1		0		67	2	130	Degenerative Spondylolisthese L4/5	Dorsale Spondylodese L4/5 (Instrumentierung Sy. Legacy) mit Laminektomie L4, Transversektomie und Facettektomie L4/5 bds. und interkorporelle Fusion in TLIF Technik mittels Tezo-T Cages (9mm, Small)	1	2		5	1		1	0
1		0		31	2	102	Lumbosakrale Übergangsstörung L6/S1, Neoarthros rechts, Einseitige Spondylolyse links	Spondylodese L6/S1, dorsale Instrumentierung (System Legacy, Medtronic), TLIF-Cage (tezoT, Titan, Fa. Ulrich), Anlagerung Spongiosa Neoarthros rechts	0	2		4	1		1	1
1		0		61	2	123	Drehgleiten LWK3/4;Stenose LWk3-5, Punktförmige Duraläsion LWK4/5 re	Spondylodese LWK3/4 mit dorsoventraler Korrektur, Deko L3-5 von re, Duranaht	1	2		10	1		1	1
1		0		73	3	143	Hochgradige SKS L4/5 bei Ventrolisthese, M. Bastrup, intraoperativ Fraktur des Pedikels L4 rechts	Spondylodese L3-L5 mit dorsoventraler Korrektur, dorsale Instrumentierung (Legacy, Titan, Fa. Medtronic), Transversektomie mit vollständiger Resektion der Facettengelenke und des Ligamentum flavum L4/5 beidseits, ventrales Release, TLIF-Cage (tezoT, Titan	0	2		10	2	1	2	1
1		0		54	2	116	Degerative Spondylolisthese L4/5 mit hochgradiger Spinalkanalstenose	Spondylodese L4/5 mit dorsoventraler Korrektur, dorsale Instrumentierung (Legacy, Titan, Fa. Medtronic), Transversektomie mit vollständiger Resektion der Facettengelenke und des Ligamentum flavum beidseits, ventrales Release, TLIF-Cage (tezoT, Titan, Fa.	1	2		6	1		1	0
1		0		71	3	56	Fraktur L1	Perkutane Instrumentierung Th12-L2 (Ennovate, Fa Aesculap). Biportale Kyphoplastie LWK-1	0	2		9	1		2	1
1		0		67	2	117	Degenerative Spondylolisthese L4/5 mit konsekutiver Spinalkanalstenose	Spondylodese L4/5 mit dorsoventraler Korrektur, dorsale Instrumentierung (Legacy, Titan, Fa. Medtronic), Transversektomie mit vollständiger Resektion der Facettengelenke und des Ligamentum flavum beidseits, ventrales Release, TLIF-Cage (tezoT, 9mm Titan,	1	2		7	1		1	0
1		0		69	2	166	deg. Listthese L4/5	dorsale SD L4/5	1	2		6	1		1	0
1		0		80	3	145	Ventrolisthese L4/5 mit sutotaler Spinalkanalstenose bei Spontanfusion L5/S1 und ausgeprägter lumbaler Loordose	Spondylodese L4-S1 mit dorsoventraler Korrektur L4/5, dorsale Instrumentierung L4-S1 (Legacy, Titan, Fa. Medtronic), Transversektomie mit vollständiger Resektion der Facettengelenke und des Ligamentum flavum L4/5 beidseits, ventrales Release, TLIF-Cage L4	1	2		9	1		2	0
1		0		77	2	54	Zentrale Spinalkanalstenose L4/5	dSD mit ventrodorsalem Release L4/5	1	2		6	1		1	1
1		0		78	2	149	Listhese LWK 4/5 mit seg. Kyphose und Stenose LWk3-5	Spondylodese LWK4/5 mit dorso-ventraler Korrektur und Deko LWK3-5	1	2		6	1		1	0
1		0		57	2	118	Osteochondrose mit segmentalem Lordosevelust LWK5/SWK1	Spondylodese LWK5/SWK1 mit dorso-ventraler Korrektur (von 10,9 auf 18,1 Grad)	1	2		6	1		1	1
1		0		72	2	72	Osteochondrose und Drehegleiten L3/L4 bei re. konvexe lumbale Skoliose mit kosekutiver SKS L3/L4	dorsale Spondylodese L3/L4 (Legacy, Medtronic) mit dorsp-ventraler Korrektur, interkorporelle Fusion mittels Cage (8 mm), Dekompression von bds	1	2		6	1		1	1
1		0		63	1	123	Deg. Spondylolisthese L4/5	dorsoventrale SD L4/5	1	2		6	1	1	1	1
1		0		84	3	115	deg Spondylolisthese L4/5	dorsale SD L4/5, Deko L3-5	1	2		7	1		1	0
1		0		80	2	143	lumbale Kyphose mit Spondylolysthese L4/5 und zentrale Spinalkanalstenosen L3-5	Dorsale relordosierende Korrekturspondylodese L3-5 nach Zielke, dorsale Instrumentierung (Legacy, Titan, Fa. Medtronic), Transversektomie mit vollständiger Resektion der Facettengelenke und des Ligamentum flavum beidseits, ventrales Release, TLIF-Cages vo	1	2		8	1		2	1
1		0		63	2	96	Skoliose, -sks L4/5	dorsoventrale Korrektur L4/5	1	2		6	1		1	1
1		0		78	3	141	Rechtskonvexe Lumbalskoliose mit lumbaler Kyphose, Spondylolisthese L3/4, relative Spinalkanalstenose L3/4 und hochgradige Spinalkanalstenose L4/5	Dorsale relordosierende Korrekturspondylodese L3-L5 nach Zielke, dorsale Instrumentierung (Legacy, Titan, Fa. Medtronic), Transversektomie mit vollständiger Resektion der Facettengelenke und des Ligamentum flavum beidseits, ventrales Release, TLIF-Cages v	1	2		7	1		2	1
1		0		43	2	119	Osteochondrose L4/5, alter vernarbter NPP links	Spondylodese L4/5 (Instrumentierung Ennovate,interkorporelle Fusion Titan-Cage Tezo-T in TLIF Technik von links), Sequester Debulging, über Wiltse Zugang bds	1	2		4	1		1	1
1		0		65	2	78	Osteochondrose L4/L5 mit konsekutiver hochgradiger SKS	dorso-ventrale Korrekturspondylodese L4/L5 (Medtronic Legacy), Dekompression bds.	1	2		6	1		1	0
1		0		75	2	190	Kyphose L5/S1, lyt. Olisthese L5/s1	dorsoventrale Korrektur L5/S1	1	2		6	1		1	1
2		0		84	2	96	Degenerative Instabilität LWS (L1/3))	Dorsale Spondylodese L1-3 (Sy. Legacy) mit posterolateraler Fusion (autogene Spongiosa und Actifuse)	0	2		8	1		2	0
1		0		53	2	168	Listhes LWK4/5 in Kyphose	SD LWk4/5 mit dorso-ventraler Korrektur und Dekompression	0	2		6	1		1	1
2		0		65	3	211	lytisch spondylolisthese L5/S1 mit Kyphosierung	Lordosierungs-Spondylodese L4-S1	1	2		7	1		2	0
2		0		79	2	66	Ventrolisthese L4/L5 mit konsekutiver SKS	Dorsale Spondylodese L4/L5 , dorsale Instrumentierung (System Legacy, Medtronic), TLIF-Cage (tezoT, Titan, Fa. Ulrich), posteriore Anlagerung von allogener Spongiosa, Dekompression von bds.	1	2		6	1		1	1
2		0		77	2	101	Drehegleiten und Osteochondrose L2/L3, hochgradige SKS L2-L4	Dorsale Spondylodese , dorsale Instrumentierung (System Legacy, Medtronic), TLIF-Cage (tezoT, Titan, Fa. Ulrich), posteriore Anlagerung von allogener Spongiosa L2/L3 und Dekompression L2-L4 von li.	1	2		4	1		1	1
1		0		51	2	123	Ventrolisthese L4/5, Osteochondrose L5/S1, SKS L4-S1	Dorsale relordosierende Korrekturspondylodese L4-S1 nach Zielke, dorsale Instrumentierung (Legacy, Titan, Fa. Medtronic), Transversektomie mit vollständiger Resektion der Facettengelenke und des Ligamentum flavum beidseits, ventrales Release, TLIF-Cages v	1	2		8	1		2	0
1		0		60	2	80	deg. Listhese L4/5	dorsoventrale Korrektur SD L4/5	1	2		8	1		1	1
2		0		75	3	233	Spinalkanalstenose und Osteochondrose L4-S1, Lumbale Kyphose	Dorsale relordosierende Korrekturspondylodese L4-S1 (System Legacy, Medtronic) nach Zielke, TLIF-Cage (tezoT, Titan, Fa. Ulrich), posteriore Anlagerung von allogener Spongiosa , Duranaht bei intraop. Duraleck auf Höhe L5/S1 zentral.	0	2		9	1	1	2	0
2		0		64	3	83	Spondylolyse L5	Spondylodese L5/S1 mit dorsoventraler Korrektur, dorsale Instrumentierung (Legacy, Titan, Fa. Medtronic), Laminektomie L5 mit vollständiger Resektion des Ligamentum flavum beidseits, ventrales Release, TLIF-Cage (tezoT, Titan, Fa. Ulrich), Relordosierung,	1	2		6	1		1	1
1		0		84	3	57	Degenerative Spondylolisthese L4/5 mit konsekutiver Spinalkanalstenose	Spondylodese L4/5 mit dorsoventraler Korrektur, dorsale Instrumentierung (Legacy, Titan, Fa. Medtronic), Transversektomie mit vollständiger Resektion der Facettengelenke und des Ligamentum flavum beidseits, ventrales Release, TLIF-Cage (tezoT, Titan, Fa.	1	2		6	1		1	1
1		0		34	2	145	Lytische Spondylolisthese L5/S1	Dorsale Spondylodese L5/S1, mit dorsoventralen Korrektur,dorsale Instrumentierung (System Legacy, Medtronic), TLIF-Cage (tezoT, Titan, Fa. Ulrich), posteriore Anlagerung von allogener Spongiosa	1	2		6	1		1	0
1		0		74	2	211	Lordoseverlustt LWK2-4Bei Osteochondrose und Drehgleiten LWK3/4	Relordorsiergungs Sd LWK2-4 (von 14,1 auf 32,2 Grad)n. Zielke	0	2		8	1		2	0
2		0		73	3	211	Bi´segmentale Lishese L4-6 in Kyphose mit konsekutiver hochgradiger Spinalkanalstenose	Relordorsierungsspondylodese LWK4-6 mit interkorporeller und posterolateraler Fusion, Durapatch Schulter L5 Wurzel links (Lordosegewinn 16 Grad)	1	2		14	2	1	2	0
1		0		78	3	152	Osteochondrose - Kyphosierung - Spinalkanalstenose L1-3	Lordosierungsspondylodese L1-3 (Instrumentierung Legacy, interkorporelle Fusion TLIF Tezo-T), Dekompression-Facettektomie L1/2 u. L2/3 bds	1	2		7	1		2	0
1		0		65	2	120	Spondylolisthese mit konsekutiver Spinalkanalstenose L4/5	Dorsale Spondylodese L4/5 mit dorso-ventaler Korrektur, dorsale Instrumentierung (System Legacy, Medtronic), TLIF-Cage (tezoT 9S, Titan, Fa. Ulrich), posteriore Anlagerung von allogener Spongiosa, Lordoseverbesserung um 8°	1	2		6	1		1	1
1		0		63	3	173	Degenrative Spondylolisthese mit hochgradiger Spinalkanalstenose L4/S1	Dorsale relordosierende Korrekturspondylodese L4/S1 nach Zielke, dorsale Instrumentierung (Legacy, Titan, Fa. Medtronic), Transversektomie mit vollständiger Resektion der Facettengelenke und des Ligamentum flavum beidseits auf L4/S1 mit Laminektomie L5, v	0	2		7	1		2	0
2		0		82	3	174	Listhese LWk4/5 mit Lordoseverlust, hochgradige Stenose l3-5	SD mit dorso-ventrale Korrektur LWk4/5,(4 Grad Lordosegewinn nach Reposition)interkorporelle und postero-laterale Fusion mit Eigenspongiosa	1	2		6	1		1	0
1		0		63	2	115	Segm Kyphose L4/5	Spondylodese L4/5 mit dorsoventraler Korrektur, dorsale Instrumentierung (Legacy, Titan, Fa. Medtronic), Transversektomie mit vollständiger Resektion der Facettengelenke und des Ligamentum flavum beidseits, ventrales Release, TLIF-Cage (tezoT, Titan, Fa.	1	2		6	1		1	1
1		0		58	2	148	Listhese LWk4/5 in segmentaler Kyphose bei linkonvexer degenerativer Lumbalskoliose	dorso-ventrale Korrekturspondylodese LWk4/5	1	2		10	2		1	1
2		0		56	2	121	Segmentale Kyphosierung, Osteochondrose und ventralem Kollaps L4/L5 mit konsekutiver hochgradiger Spinalkanalstenose	Spondylodese L/L5 mit dorsoventraler Korrektur, dorsale Instrumentierung (Legacy, Titan, Fa. Medtronic), Transversektomie mit vollständiger Resektion der Facettengelenke und des Ligamentum flavum beidseits, ventrales Release, TLIF-Cage (tezoT 10mm M, Tita	1	2		6	1		1	1
1		0		41	2	113	Anterolisthese L2/3 mit absoluter Spinalkanastenose L2/3, segmentale Kyphose	Dorsale relordosierende Korrekturspondylodese L2-4 nach Zielke, dorsale Instrumentierung (Legacy, Titan, Fa. Medtronic), Transversektomie mit vollständiger Resektion der Facettengelenke und des Ligamentum flavum beidseits, ventrales Release, TLIF-Cages vo	1	2		4	1		2	1
1	Wundrevision	1		86	3	105	Frische osteoporotische L5 Fraktur mit Spinalkanalstenose	Mikrochirurgische Dekompression L4/S1 von li. und dorsale Instrumentierung L4/S1 (System Legacy, Medtronic) mit zementaugmentierten Schrauben auf L4 und L5	1	1		19	1		2	0
2		0		68	2	160	deg. Listhese L4/5	Spondylodese L4/5 mit dorsoventraler Korrektur, dorsale Instrumentierung (Legacy, Titan, Fa. Medtronic), Transversektomie mit vollständiger Resektion der Facettengelenke und des Ligamentum flavum beidseits, ventrales Release, TLIF-Cage (tezoT, Titan, Fa.	1	2		6	1		1	0
2		0		80	2	276	L4/5 Spondylolisthese mit absoluter Spinalkanalastenose an L3-5	Dorsale relordosierende Korrekturspondylodese L3-5 nach Zielke, dorsale Instrumentierung (Legacy, Titan, Fa. Medtronic), Transversektomie mit vollständiger Resektion der Facettengelenke und des Ligamentum flavum beidseits, ventrales Release, TLIF-Cages vo	1	2		8	1		2	0
1		0		64	3	63	Anterolisthese L3/4 mit konsekutiver hochgradiger Spinalkanalstenose	Spondylodese L3/4 mit dorsoventraler Korrektur, dorsale Instrumentierung (Legacy, Titan, Fa. Medtronic), Transversektomie mit vollständiger Resektion der Facettengelenke und des Ligamentum flavum beidseits, ventrales Release, TLIF-Cage (tezoT, Titan, Fa.	1	2		6	1		1	1
2		0		77	2	169	Kyphoskoliose L4/5,SKS	dorsoventrale Korrekturspondylodese L4/5	1	2		6	1		1	0
1		0		39	2	233	Lytische Spondylolisthese L5/S1 mit Spinalkanalstenose und NPP L4/5 li.	Dorsale relordosierende Korrekturspondylodese L4/S1 nach Zielke, dorsale Instrumentierung (Legacy, Titan, Fa. Medtronic), Transversektomie mit vollständiger Resektion der Facettengelenke und des Ligamentum flavum beidseits, ventrales Release, TLIF-Cages v	1	2		6	1		2	0
1		0		51	2	132	Lytische Spondylolisthese L5/S1	Dorsale Spondylodese L5/S1. dorsale Instrumentierung (System Solera, Medtronic), TLIF-Cage (tezoT, Titan, Fa. Ulrich), posteriore Anlagerung von allogener Spongiosa	1	2		6	1		1	1
1		0		48	2	180	Spondylolisthese L5/S1 mit hochgradiger Foramenstenose L5	Spondylodese L5/S1 interkorporell und posterolateral mit dorso-ventraler Korrektur	0	2		8	1		1	0
2		0		85	2	64	Spondylolisthese L4/5	Spondylodese L4/5 mit dorsoventraler Korrektur, dorsale Instrumentierung (Solera, Titan, Fa. Medtronic), Transversektomie mit vollständiger Resektion der Facettengelenke und des Ligamentum flavum beidseits, ventrales Release, TLIF-Cage von links (tezoT, T	1	2		6	1		1	1
1		0		60	2	157	Osteochondrosebedingte Spondylolisthe L4/5	Spondylodese L4/5 mit dorsoventraler Korrektur, dorsale Instrumentierung (Solera, Titan, Fa. Medtronic), Transversektomie mit vollständiger Resektion der Facettengelenke und des Ligamentum flavum beidseits, ventrales Release, TLIF-Cage (tezoT 9mm, Titan,	1	2		6	1		1	0
1		0		81	3	160	Listhese LWk4/5, Pedikelfraktur L4 li.	Spondylodese LWk3-LWK5 mit Dekompresssion L4/5	1	2		6	1		2	0
1		0		80	2	58	Degenerative Spondylolisthese L4/5 mit konsekutiver hochgradiger Spinalkanalstenose	dorsale Spondylodese L4/5 mit dorso-ventraler Korrektur, Faccettektomie bds., Dekompression, TLIF-cage von links, posterolaterale Fusion	1	2		4	1		1	1
1		0		68	3	66	Linkskonvexe Lumbalskoliose mit Drehgleiten im Segment L4/5 und konsekutiver Stenose	dorsale Spondylodese L4/5, dorsoventrale Korrektur, Facettektomie bds. Dekompression bds., posterolaterale Fusion	1	2		4	1		1	1
2		0		79	2	49	SKS L3/L4 sowie Segmentdegeneration bei Spontanfusion L4-S1	Dorsale Instrumentierung L3/L4 (Sas. Cosmic Fa. Ulrich) , Dekompression L3/L4 von re.	1	2		5	1		1	1
2	Seroma, wundrevision	1		35	2	154	Lyt. Olisthese L5/S1	dorsale SD L5/s1	1	2		16	3	1	1	1
2		0		63	2	132	Listhese LWk3/4	Spondylodese in dorso-ventraler Korrektur L3/4	1	2		5	1		1	1
2		0		75	3	95	Pathologische TH7 Instabilität bei methastasierten Plasmazytom	dorsale Instrumentierung Th6-Th8 (Medtronic, Solera), Hemilaminektomie Th7, Tumorreduktion und Dekompression von re.	1	2		13	1	1	2	0
1		0		76	2	58	Postdekompression Syndrom mit ausgeprägter Osteochondrose und SKS L4/L5	Dorsale Spondylodese L4/L5, dorsale Instrumentierung (System Solera, Medtronic), TLIF-Cage (tezoT, Titan, Fa. Ulrich), posteriore Anlagerung von allogener Spongiosa, Dekompression L4/L5 von bds.	1	2		4	1		1	1
1		0		51	2	147	Ventrolysthese L4/L5 mit konsekutiver knöchener SKS bds	Dorsale Spondylodese L4/L5, dorsale Instrumentierung (System Solera 50 mm Schrauben, Medtronic), TLIF-Cage (tezoT, Titan, 10 mm S Fa. Ulrich), posteriore Anlagerung von allogener Spongiosa, Dekompression von bds.	1	2		5	1		1	0
1		0		89	3	126	LWK5 Fraktur		1	2		17	2	1	2	1
1		0		50	2	101	Ventrolisthese L5/S1 bei linksseitiger Spondylolyse L5	Dorsale Spondylodese L5/S1, dorsale Instrumentierung (System Solera, Medtronic), TLIF-Cage (tezoT, Titan, Fa. Ulrich), Laminektomie L5, Dekompresion L5-Wurzel bds., posteriore Anlagerung von allogener Spongiosa	1	2		4	1		1	1
2		0		70	2	105	Spinalkanalsztenose L3/4 linksbetont mit intraforaminaler Einengung L3 li.	Dorsale Instrumentierung L3/4 (Sy. Solera) mit mikrochirurgischer Dekompression der li. L3 Foramina und des Spinalkanals auf L3/4 von li. und zur Gegenseite	1	2		5	1		1	1
1		0		72	2	111	Spondylolisthese L4/L5 bei Spondylolyse L4, Intraop. Duraleck	Dorsale Spondylodese L4/L5, dorsale Instrumentierung (System Solera, Medtronic), TLIF-Cage (tezoT, Titan, Fa. Ulrich), posteriore Anlagerung von allogener Spongiosa, Duranaht, Laminektomie L4, Dekompression von bds.	1	2		4	1	1	1	1
1		0		64	2	122	Postdekompression-Syndrom und Drehegleiten L3-L5	Dorsale Spondylodese L3-L5, dorsale Instrumentierung (System Solera, Medtronic), TLIF-Cage (tezoT, Titan, Fa. Ulrich), posteriore Anlagerung von allogener Spongiosa, Dekompression von re.	0	2		5	1		2	1
1		0		58	2	78	Deg. Spinalkanalstenose L4/5 bei Listhese und einer Facettengelenkszyste rechts	Dorsale Spondylodese , dorsale Instrumentierung L4/5 (System Solera, Medtronic), TLIF-Cage von links (tezoT 8mm,S, Titan, Fa. Ulrich), posteriore Anlagerung von allogener Spongiosa	1	2		5	1		1	1
1		0		54	1	106	lyth Listhese L5/S1	dors Repo-SD L5/S1(Krypton), Abdecken einer Duraläsion	1	2		6	1	1	1	1
2		0		35	2	214	Spondylolyse L5, mit Listhese L5/S1	Dorsale Spondylodese L4-S1, dorsale Instrumentierung (System Solera, Medtronic), TLIF-Cages L4/5 und L5/S1 (tezoT 10mm, S iund 8mmS, Titan, Fa. Ulrich), Laminektomie LWK5 und Hemilaminektomie LWK 4 links, posteriore Anlagerung von allogener Spongiosa	1	2		5	1		2	1
1		0		72	3	165	Lumbalskoliose L3-5	dorsale SD L3-5	1	2		5	1		2	0
1		0		49	3	122	Spinalkanalstenose L4-S1Anterolisthese L4/5	Dorsale Spondylodese L4-S1, dorsale Instrumentierung (System Solera, Medtronic), TLIF-Cage (tezoT, Titan, Fa. Ulrich), posteriore Anlagerung von allogener Spongiosa	1	2		5	1		2	1
2		0		71	2	170	lumbale Skoliose, SKS L3-5	dorsale SD L4/5, Deko L3-5	1	2		5	1		1	0
1		0		48	2	94	Spondylolisthese L4/5	Dorsale Spondylodese L4/5, dorsale Instrumentierung (System Solera, Medtronic), TLIF-Cage (tezoT, Titan, Fa. Ulrich) von rechts, posteriore Anlagerung von allogener Spongiosa	1	2		4	1		1	1
1		0		58	2	82	Lumbalskoliose	dorsale SD L4/5	1	2		4	1		1	1
1		0		76	2	80	Berstungsfraktur BWK 8	dorsale, perkutane Instrumentierung Th7-9	0	2		7	1		2	1
2		0		82	2	99	lyth Listh L5/S1 mit intrafor NPP li	dSD L5/S1 (Solera) mit Sequesterktomie und 2x PLIF	1	2		8	1		1	1
2		0		58	2	141	Listhese L4/5 mit Synovialcyste re bei Vor OP mit Deko	SD L4/5 interkorporell (TLIF) und posterolateral mit Dekompression, Facettektomie L4/5 re. und Zystenresektion	1	2		5	1		1	0
1		0		68	2	153	Bisegmentale Listhese L3-5 bei re konvexer Skoliose	Dorsale Spondylodese L3-5 posterolateral, dorsale Instrumentierung (System Solera, Medtronic), TLIF-Cage von rechts L4/5 (tezoT 10mmS, Titan, Fa. Ulrich), posteriore Anlagerung von allogener Spongiosa	1	2		19	1		2	1
1		0		50	2	132	lyth Spondylolisthese L4/5, intraform NPP L4/5 re	d-RepositionsSD L4/5 ( Solera, Medtronic) mit TLIF von li und Laminektomie L4	1	2		5	1		1	1
1		0		76	2	91	Ventrolisthese L4/5 mit konsekutiver hochgradiger Spinalkanalstenose L4/5, SKS L3/4	Spondylodese L4/5 mit dorsoventraler Korrektur, dorsale Instrumentierung (Solera, Titan, Fa. Medtronic), Transversektomie mit vollständiger Resektion der Facettengelenke und des Ligamentum flavum beidseits, ventrales Release, TLIF-Cage von links (tezoT, H	1	2		5	1		1	1
2		0		69	3	75	Degenerative Ventrolisthese L3/4 mit Lordoseverlust und Spinalkanalstenose	Dorsale Spondylodese L3/4 (Sy. Solera, Fa. Medtronic), interkorporelle Fusion L3/4 in TLIF-Technik (Tezo-T Cage, Fa. Ulrich) von li. mit Dekompression bds., Transversektomie und Facettektomie bds., Reponierung der Listhese und Relordosierung, Anlage von a	1	2		5	1		1	1
1		0		60	2	119	Spondylolisthese L4/5 mit konsekutiver SPK und NPP L5/S1 rechts	Dorsale Spondylodese L4/5, dorsale Instrumentierung (System Solera, Medtronic), TLIF-Cage von links (tezoT 10mmS, Titan, Fa. Ulrich), nucleo und Sequestrectomie L5/S1 rechts in mikrovhir. Technik. posteriore Anlagerung von allogener Spongiosa	1	2		4	1		1	1
1		0		73	2	44	Nachsinterung LWK 3 bei Z.n. biportaler Ballonkyphoplastie bei Fraktur	dorsale Instrumentierung L2-4 über Wiltse-Zugänge (L3 links nicht besetzt)	1	2		34	2		2	1
2		0		68	2	85	Degenerative Instabilität mit Spondylolisthese L4/5 und konsekutiver Spinalkanalstenose	Dorsale Spondylodese L4/5 (Solera) & Dekompression und Einbringen eines TLIF (Tezo-T) L4/5 von links, posterolaterale Fusion.	1	2		4	1		1	1
1		0		80	3	125	Listhese L4/5 mit 20% Gleitweg und konsekutiver Spinalkanalstenose	SD L4/5 interkorporell und posterolateral, Dekompression	1	2		6	1		1	0
1		0		79	3	60	Degenerative Instabilität L3/4 mit konsekutiver Stenoseintraop. Duraleck L3/4	dorsale Spondylodese L3/4, TLIF-cage von rechts, Dekompression rechts, posterolaterale Fusion, Fettpatchplastik	0	2		15	1	1	1	1
1		0		36	2	148	lyt. Olisthese L5/s1	dorsale SD L4-S1	1	2		6	1		2	1
1		0		65	2	143	deg Spondylolisthese L4/5 mit konsek. abs SKS	Dorsale Spondylodese L4/5 , dorsale Instrumentierung (System Solera, Medtronic), TLIF-Cage von li (tezoT, Titan, Fa. Ulrich), posteriore Anlagerung von allogener Spongiosa	1	2		5	1		1	1
2		0		78	2	140	LWK I Fraktur mit Hinterkantenbeteiligung und Myelonkompression	Dorsale Instrumentierung BWK 12-L2 mit zementaugmentation (Ennovate, Fa Aesculap), Laminektomie L1	1	2		10	1		2	0
1		0		49	2	152	Osteochondrose L5/S1	Dorsale Spondylodese L5/S1 über Wiltse-Zugänge bds., dorsale Instrumentierung (System Ennovate, Fa. Aesculap), TLIF-Cage (tezoT Höhe 9 mm, 5°, Titan, Fa. Ulrich), posteriore Anlagerung von allogener Spongiosa	1	2		5	1		1	1
2		0		70	2	123	Listhese L4/5 mit konsek. Spinalkanalstenose L3-5	Dorsale Spondylodese L4/5 (Solera), TLIF-Cage L4/5 (Tezo-T), Dekompression L3-L5, posteriore Fusion mit autologer Spongiosa	1	2		6	1		1	1
2		0		78	3	40	Fraktur L1	Dorsale Spondylodese Th12-L2 (Sy. Ennovate)	1	2		21	2		2	1
2		0		53	2	126	lyt. Olisthese L4/5	dorsale SD L4/5	1	2		5	1		1	1
1		0		67	3	70	Instabile Fraktur L2	Zementaugemtierte Spondylodese L1-3 (Ennovate, Fa Aesculap)	1	2		13	1		2	1
2		0		42	2	224	Lyse L5/S1, Osteochondrose L4/5	SD L4-S1 interorprell und posterolateral	1	2		5	1		2	0
1		0		78	2	131	Spondylolisthese L4/5 mit absoluter konsekutiver Spinalkanalstenose L4/5	Mikrochirurgische Dekompression L4/5 von links und over the top; dorsale Instrumentierung (ennovate) L4/5 minimalinvasiv	0	2		4	1		1	1
1		0		81	3	98	Degenerative Spondylolisthese L4/5, absolute Spinalkanalstenose L3-5	dorsale Spondylodese L4/5, Fascettektomie bds., Dekompression L4/5 über Transversektomie, Dekompression L3/4 von rechts und over the top, posterolaterale Fusion	1	2		9	1		1	0
1		0		53	2	123	Lytische Spondylolisthese L5/S1. Bogenverschlussstörung L5 und S1	Spondylodese L5/S1 (Solera, interkorporelle Fusion TLIF Tezo-T von rechts). Laminektomie L5, S1, Neurolyse L5 bds	1	2		5	1		1	1
1		0		51	2	142	Spondilolisthese L4/5 mit konsekutiver Einengung des SPK	Dorsale Spondylodese L4/5, dorsale Instrumentierung (System Solera, Medtronic), TLIF-Cage (tezoT 9mmS, Titan, Fa. Ulrich), posteriore Anlagerung von allogener Spongiosa	1	2		9	1		1	0
2		0		73	3	100	Spondylolisthese L4/5	Dorsale Spondylodese L4/5, dorsale Instrumentierung (System Solera, Medtronic), TLIF-Cage (tezoT, Titan, Fa. Ulrich), posteriore Anlagerung von allogener Spongiosa	1	2		6	1		1	1
1		0		79	2	129	Deg. Spondylolisthese L3/4, SKS L3-5	Dorsale Spondylodese L3/4, dorsale Instrumentierung (System Solera, Medtronic), TLIF-Cage (tezoT, Titan, Fa. Ulrich), Dekompression L3-5, posteriore Anlagerung von allogener Spongiosa	1	2		4	1		1	1
2		0		72	3	240	Degenerative Spinalkanalstenosen L2-5, Spondylolisthese L4/5	Dorsale Spondylodese L4/5, dorsale Instrumentierung (System Solera, Medtronic), TLIF-Cage (tezoT, Titan, Fa. Ulrich), Mikrochir. Dekompression L2-5 von links und over-the-top zur Gegenseite, posteriore Anlagerung von allogener Spongiosa	1	2		10	1		1	0
1		0		75	2	193	deg Skoliose mit lat Kollapsing und NF L5/S1 li und L4/5 re	dSD L4-S1 (Solera, Medtronic) partiell zementaugmentiert (L4+L5 li) mit TLIF (Tezo T) L4/5 von re und L5/S1 von li, post Fusion mit autolog Spongiosa	1	2		6	1		2	1
1		0		77	2	201	Listhese L3-5 in Kyphoskoliose bei hochgradiger Spinalkanalstenose, Duraläsion L3/4 li <2mm	SD L3-5 mit Dekompression und interkorporeller und posterolat. Fusion, Duranaht	1	2		7	1	1	2	0
1		0		81	3	106	Deg. Spondylolisthese L4/5	dorsale SD L4/5, Sequestrektomie re	1	2		7	1	1	1	0
2		0		77	2	124	linkskonvexe Lumbalskoliose	Dorsale Spondylodese L3-L5 mit Teilkorrektur der Skoliose, dorsale Instrumentierung (System Solera, Medtronic), TLIF-Cages L3/4 und L4/5 von rechts (tezoT, Titan, Fa. Ulrich), posteriore Anlagerung von allogener Spongiosa	1	2		6	1		2	1
1		0		71	2	142	Ventrolisthese L4/5 mit hochgradiger Spinalkanalstenose, Spondylolyse L5 mit Ventrolisthese L5/S1	Dorsale Spondylodese L4-S1 (Solera), Transversektomie L4/5, Laminektomie L5, 2xTLIF-Cages von links (Tezo-T)	1	2		8	1		2	1
1		0		70	3	145	li konvexe Skoliose bei Z.n. Deko L4/5 von li, Osteochondrose	Spondylodese L4-S1 mit unilaterale posterolatealer und Intercorporeller Fusion	1	2		6	1		2	0
2		0		45	2	119	Osteochondrose L5/S1	SD L5/S1 mit interkorporeller und posterolateraler Fusion	1	2		5	1		1	1
1		0		81	2	112	Pseudospondylolisthese L4/5	Dorsale Spondylodese L4/5, dorsale Instrumentierung (System Solera, Medtronic), TLIF-Cage (tezoT, Titan, Fa. Ulrich), posteriore Anlagerung von allogener Spongiosa	1	2		5	1		1	1
1		0		66	2	89	Degenerative Spondylolisthese L4/5 mit konsekutiver absoluter Spinalkanalstenose	dorsale Spndylodese L4/5 (Syst. Solera), Fascettektomie L4/5 bds., Dekompression bds., TLIF-cage von links, posterolaterale Fusion	1	2		4	1		1	1
1		0		60	3	120	Pseudospondylolisthese L4/5	dorsale SD L4/5	1	2		5	1		1	1
2		0		48	2	92	Degenerative Instabilität L4/5 mit erheblicher Bandscheibenvorwölbung und Spinalkanalstenose L4/5, intraoperative Duraläsion mittig auf Höhe L4/5	Dorsale Spondylodese L4/5, dorsale Instrumentierung (System Solera, Medtronic), TLIF-Cage (tezoT, Titan, Fa. Ulrich), Fettpatchplastik, posteriore Anlagerung von allogener Spongiosa	1	2		4	1	1	1	1
2		0		76	2	132	Degenerative Spondylolisthese L4/5 mit hochgradiger konsekutiver Spinalkanalstenose L2-5	Mikrochirurgische Dekompression L2-5 Spondylodese L4/5 mit dorsoventraler Korrektur, dorsale Instrumentierung (Solera, Titan, Fa. Medtronic), Transversektomie mit vollständiger Resektion der Facettengelenke und des Ligamentum flavum beidseits, ventrales R	1	2		5	1		1	1
1		0		70	3	188	deg Listhese L4/5	dorsale SD L4/5 , Deko L2-S1	1	2		8	1	1	1	0
1		0		64	2	145	Listhese L4/5 in Kyphose, NPP L5/S1 li med.lateral sublig	SD L4/5 in Relordorsierung, Deko L4/5; Sequestrektomie L5/S1 li mikrochir.	1	2		6	1		1	0
1		0		73	2	109	Deg. Spondylolisethese L4/5 mit absoluter SKS	dorsale SD L4/5Dorsale Spondylodese , dorsale Instrumentierung (System Solera, Medtronic), TLIF-Cage (tezoT, Titan, Fa. Ulrich), posteriore Anlagerung von allogener Spongiosa, Facettecomie bds.	1	2		6	1		1	1
1		0		48	2	69	Große Facettengelenkszyste L4/5 links bei degenerativer Spondylolisthese	dorsale Spondylodese L4/5 (Syst. Solera), Fascettektomie bds., Dekompression bds., Entfernung Zystenwand, TLIF-cage von links, posterolaterale Fusion	1	2		4	1		1	1
1		0		93	1	97	Hochgradige Spinalkanalstenose L3/4 mit Instabilität nach lumbaler Skoliose	Dorsale Instrumentierung (Cosmic) L3/4 über Wiltse-Zugang und mikrochirurgische Dekompression L3/4 von links bis zur Gegenseite	1	2		13	2		1	1
2		0		51	3	284	Segmentdegeneration L4/5, Spondylolyse LWK5, Bogenschlussstörung L5	dSD L4-S1 minimalinvasiv computernavigiert (System SOlera, Medtronic) mit PLIF L5/S1 und TLIF L4/5, Laminektomie L5 und Neurolyse bds	1	2		5	1		2	0
1		0		56	3	166	Lytische Spondylolisthese L5/S1	Repositionsspondylodese L4-S1 (Instrumentierung SOLERA), interkorporelle Fusion in TLIF Technik Tezo-T von links, Laminektomie L5, Neurolyse L5 bds	1	2		6	1		2	0
1		0		75	2	127	Degenerative Instabilität L3-5 mit konsekutiver SKS	Spondylodese L3-5 (Instrumentierung SOLERA), interkorporelle Fusion in TLIF Technik Tezo-T von rechts. Deko L3/4 re, L4/5 bds	1	2		14	1		2	1
2		0		58	2	173	Spondylolisthese L4/5 mit konsek. Spinalkanalstenose (Spontanfusion L5/S1)	SD L4/5 mit Deko	1	2		4	1		1	1
2		0		69	3	123	path Fraktur Th2 bei großer Osteolyse	dSpondylodese Th1-3 (neon3, Ulrich) computernavigiert, PE transpedikulär Th2 li, post Fusion mit PerOssal	1	2		15	1		2	1
1		0		52	2	162	Degenerative Spondylolisthese mit konsekutiver Spinalkanalstenose L4/5	Spondylodese L4/5 (Instrumentierung SOLERA), interkorporelle Fusion TLIF Tezo.-T von links, Facettektomie-Dekompression bds. Duranaht bei Duraleck Axilla Nervenwurzel L5 links.	1	2		7	1	1	1	0
1		0		65	2	131	Degenerative Instabilität L4/5 mit konsekutiver SKS	Spondylodese L4/5 (Instrumentierung SOLERA) in PLIF Technik (2x Tezo-P). Deko L4/5 bds	1	2		8	1		1	1
1		0		57	3	157	Ausgeprägte Osteochondrose L4/5 mit höhergradiger Spinalkanalstenose	Dorsale Spondylodese L4/5 (Sy. Solera) mit interkorporeller Fusion L4/5 in TLIF-Technik (Tezo-T Cage, Fa. Ulrich), Facettektomie L4/5 li., Dekompression von li. bis zur Gegenseite, Anlage von autogener Spongiosa zur dorsolaterlan Fusion.Gelitapatch nach p	1	2		6	1	1	1	1
1		0		53	2	149	Spondylolisthese L4/5	Dorsale Spondylodese L4/5 , dorsale Instrumentierung (System Solera, Medtronic), TLIF-Cage von links (tezoT,Höhe 10mm, 5° Gr.M Titan, Fa. Ulrich), Dekompression, posteriore Anlagerung von allogener Spongiosa	1	2		5	1		1	0
1		0		51	2	133	Lytische Spondylolisthese L4/5 Meyerding III	Repositionsspondylodese L4/5 (Instrumentierung SOLERA-VOYAGER), in PLIF Technik (2x Prospace), Laminektomie L4, Neurolyse L4 bds	1	2		5	1		1	1
2		0		83	2	57	BWK 12 Fraktur	Dorsale Instrumentierung Th11-L1, Schrauben zementiert	1	2		22	1		2	1
1		0		56	1	167	Osteochondrose LWK4-SWK1 bei Lordoseverlust in L5/S1	Relordorsierende SpondylodeseL4-S1(27 auf 35 Grad) mit intercorporeller und postero-lateraler Fusion	1	2		5	1		2	0
1		0		65	2	93	Osteochondrose vernarbter NPP L3/4 re	Spondylodese L3/4 (System Ennovate) über Wiltse Zugang, Dekompression-Sequester Debulking rechts	1	2		5	1		1	1
2		0		66	3	275	große Metastase Th8/9 re para bis intravertebral eines foll. SD Ca's, Pleuraadäsion auf Höhe Th9	dSD Th8-10 computernavigiert (Solera, Medtronic), Hemicorporektomie Th8/9 mit Tumorresektion in toto, Pleuranaht und Rippenteilresektion Th8+9 sowie Rhizotomie Th8+9 re	1	2		11	1		2	0
1		0		50	2	108	Listhese L4/5 mit konsek Spinalkanalstenose	Sd L4/5 mit Dekompression	1	2		5	1		1	0
2		0		55	2	132	Degenerative Skoliose - Instabilität - Spinalkanalstenose L3-5	Korrektur-Spondylodese L3-5 (Instrumentierung SOLERA) in TLIF Technik L3/4 (Tezo-T von rechts), in PLIF Technik L4/5 (2x Tezo-P), Dekompression L3/4 rechts, Deko L4/5 bds	1	2		6	1		2	1
2		0		80	2	127	Listhese L5/S1 15% Gleitweg	Fusion L5/S1 mit Dekompression ( intercorporeller und posterolateral), Dstem Solera Fa Medtronic, Prospace Cage 11mm 5 Grad Fa Aesculap	1	2		4	1		1	1
1		0		62	3	121	deg Listhese L4/5 mit Rotationskomponente, atypischer Nervenwurzelabgang L4 re, intraoperative Duraläsion L4/5 re	dSd L4/5 (Solera) mit intracorp Fusion L4/5 TezoT, Facettektomie bds, Fettpatchplastik	1	2		7	1	1	1	1
1		0		85	3	80	Fraktur LWK-2 mit konsekutiver Spinalkanalstenose	Spondylodese L1-3 (Ennovate, zementaugmentiert), Laminektomie L2	1	2		15	2		2	0
1		0		84	3	55	Linkskonvexe lumbale Skoliose mit Ventrolisthese L4/5 und absoluter Spinalkanalstenose L4/5	Dorsale Spondylodese L4/5, dorsale Instrumentierung (System Solera, Fa. Medtronic), interkorporelle Fusion in TLIF-Technik (tezoT, Titan, Fa. Ulrich) mit Facettektomie und Dekompression bds., posteriore Anlagerung von autogener Spongiosa zur dorsolaterale	1	2		9	1		1	1
1		0		74	2	120	Osteochondrose, Entlordosierung, Spinalkanalstenose L4-S1	Spondylodese L4-S1 (Instrumentierung SOLERA) in TLIF Technik (Tezo-T) von links. Dekompression L4/5 bds, L5/S1 von links over-the-top	1	2		7	1		2	1
2		0		75	3	73	Lumbale Skoliose mit Translation L4/5 und Spinalkanalstenose L3-5	Dorsale Spondylodese L4/5 durch dorsale Instrumentierung (System Solera, Medtronic) und interkorporelle Fusion in TLIF-Technik von links (tezoT, Titan, Fa. Ulrich), Facettektomie L4/5 bds. mit Dekompression und Dekompression L3/4 von links durch Flavektom	1	2		5	1		1	1
1		0		74	3	88	Osteochondrose L4/5	Dorsale Spondylodese L4/5, dorsale Instrumentierung (System Solera, Medtronic), TLIF-Cage (tezoT, Titan, Fa. Ulrich), Facettectomie links, posteriore Anlagerung von allogener Spongiosa	1	2		8	1		1	0
2		0		66	2	131	Ausgeprägte Osteochondrose L4/5 mit rechtseitiger Kollabierung und konsekutiver Spinalkanalstenose	Dorsale Spondylodese L4/5, dorsale Instrumentierung (System Solera, Fa. Medtronic), interkorporelle Fusion in TLIF-Technik (tezoT, Titan, Fa. Ulrich), Facettektomie L4/5 bds., Dekompression bds., posteriore Anlagerung von autogener Spongiosa	1	2		4	1		1	1
2		0		80	3	109	Spondylolisthesis L4/5 mit Facettegelenkhypertrophie bds. und absoluter Spinalkanalstenose	Dorsale Spondylodese L4/5, dorsale Instrumentierung (System Solera, Medtronic), interkorporelle Fusion in TLIF-Technik (TezoT-Cage, Fa. Ulrich), Facettektomie und Dekompression L4/5 bds., posteriore Anlagerung von autogener Spongiosa	1	2		7	1		1	1
1		0		60	2	147	deg. Spondylolisthese L4/5	dorsale SD L4/5	1	2		8	1		1	0
1		0		59	2	103	Spondylolisthese L4/5 mit dynamischer Spinalkanalstenose	Dorsale Spondylodese L4/5, dorsale Instrumentierung (System Solera, Medtronic), TLIF-Cage (tezoT, Titan, Fa. Ulrich) von links, Dekompression vin links mit Undercutting zur Gegenseite, Recessusentdachung L5 rechts, posteriore Anlagerung von allogener Spo	1	2		25	2		1	1
2		0		89	3	116	Listhese L3/4 mit konsek Spinalkanalstenose L2-4	SD L3/4, mikrochirurg. Dekompression L2-4 over the top von li	1	2		4	1		1	0
2		0		75	2	137	Osteochondrose L4/5 bei hochgradiger Spinalkanalstenose	Dorsale Spondylodese L4/5, dorsale Instrumentierung (System Solera, Medtronic), TLIF-Cage (tezoT 10mmM, Titan, Fa. Ulrich), posteriore Anlagerung von allogener Spongiosa	1	2		4	1		1	1
2		0		52	2	101	Lytische Spondylolysthese L5 mit Foraminaler Stenose bds.	Dorsale Spondylodese L5/S1, dorsale Instrumentierung (Sy. Solera, Fa. Medtronic), interkorporelle Fusion in PLIF-Technik (TezoP-Cage x2, Fa. Ulrich), Lysezone-Entfernung, posteriore Anlagerung von autogener Spongiosa	1	2		4	1		1	1
1		0		51	1	145	Lytische Spondylolisthese L5/S1, Meyerding III	Repositionsspondylodese L4-S1 (Instrumentierung SOLERA), interkorporelle Fusion L5/S1 in PLIF Technik (Prospace). Laminektomie L5, Neurolyse L5 bds. Intraoperativer Ausriss Schraube L5 links	1	2		6	1		2	1
1		0		71	2	78	Degenerative Spondylolisthese L3/4 mit höhergradiger Spinalkanalstenose	Dorsale Spondylodese L3/4, dorsale Instrumentierung (Sy. Solera, Fa. Medtronic), interkorporelle Fusion in TLIF-Technik (tezoT-Cage, Fa. Ulrich), Facettektomie und Dekompression L3/4 bds., posteriore Anlagerung von autogener Spongiosa	1	2		5	1		1	1
1		0		64	2	108	Osteochondrose L4/5, Spinalkanalstenose L2-5	Spondylodese L4/5 (Instrumentierung SOLERA) in TLIF Technik von links, Deko L4/5 von links over-the-top, Deko L3/4 u. L2/3 von rechts over-the-top	1	2		4	1		1	0
2		0		72	2	82	Spinalkanalstenose L1/2	Dorsale Spondylodese (Solera) & Deko in TLIF (Tezo-T)	1	2		4	1		1	1
1		0		38	1	135	Spondyloptose L5-S1	Dorsale Korrektutrsspondylodese L5-S1, dorsale Instrumentierung (Sy. Conklusion, Fa.Signus), interkorporelle Fusion in PLIF-Technik (Prospace Cage x2, Fa. AesculaP), Laminektomie L5, posteriore Anlagerung von autogener Spongiosa	1	2		4	1		1	1
2		0		74	2	100	Ausgeprägte Spondylarthrose L4/5 mit synovialer Zyste L4/5 re. und konsekutiver<höhergradiger Spinalkanalstenose	Dorsale Spondylodese L4/5, dorsale Instrumentierung (Sy. Solera, Fa. Medtronic), interkorporelle Fusion in TLIF-Technik (TezoT-Cage, Fa. Ulrich), Facettektomie und Dekpompression L4/5 bds., posteriore Anlagerung von autogener Spongiosa	1	2		4	1		1	1
1		0		54	3	185	Tumor RF re paravertebral bis an die pleura reichend und intraspinal Höhe Th9	Tumordebulking intraspinal und dorsale Instrumentierung Th8 -10 (Icotec Carbonpedikelschrauben)	1	2		4	1		2	0
2		0		64	3	125	Myelonkompression Th12-L1 mit Paraparese nach NPP Th-L1	Dorsale Spondylodese mit dorsaler Instrumentierung Th12-L1 (Sy. Solera, Fa. Medtronic), Hemilaminektomie Th12 re., Facettektomie Th12/L1 re., Sequesterektomie Th12-L1, Anlage von autigener Spongiosa zur dorsolateralen Fusion	1	2		10	1		1	1
1		0		73	2	169	Spondilolisthese L4/5	Dorsale Spondylodese L4/5, dorsale Instrumentierung (System Solera, Medtronic), TLIF-Cage (tezoT 11mmM, Titan, Fa. Ulrich), posteriore Anlagerung von allogener Spongiosa	1	2		11	1		1	0
1		0		51	2	122	Deg. Spondylolisthese mit konsekutiver Spinalkanalstenose L4/5, chronischer NPP L5/S1 links	Spondylodese L4/5 (Instrumentierung SOLERA) in TLIF Technik von links. Dekompression L4/5 bds. Sequestrektomie-Nucleotomie L5/S1 links. Duranaht bei intraoperativem Duraleck recessus L5/S1 links.	1	2		6	1	1	1	0
1		0		47	2	124	Lytische Spondylolisthese L5/S1	Dorsale Spondylodese L5/S1, dorsale Instrumentierung (System Solera, Medtronic), TLIF-Cage (tezoT, Titan, Fa. Ulrich)	1	2		4	1		1	1
2		0		54	3	117	IInstabilität L3/4 bei segmentaler Hyperlodose und konsekutiver Spinalkanalstenose, Facettengelenkszyste links, intraforaminaler BSV rechts	Dorsale Spondylodese L3/4, dorsale Instrumentierung (System Solera, Medtronic), TLIF-Cage (tezoT, Titan, Fa. Ulrich) von links, Resektion der Facettengelenke bds., posteriore Anlagerung von allogener Spongiosa	1	2		4	1		1	1
1		0		79	2	150	Li konvexe Skolioese mit Drehgelten und Listhese L3-5	Korrektur SD L3-5 interkorporell und postero-laterale Fusion, Laminektomie L5.	1	2		14	1		2	0
2		0		79	2	69	degenarative spondylolisthesis L4/5 Meyerding grade I, lateral recess stenosis with L4/5 left	Dorsale Spondylodese L4/5 , dorsale Instrumentierung (System Solera, Medtronic), TLIF-Cage L4/5 left (tezoT, Titan, Fa. Ulrich), posteriore Anlagerung von autogener Spongiosa	1	2		5	1		1	1
1		0		74	2	119	Drehgleiten L3/4	dorslae L3/4	1	2		7	1		1	1
2		0		82	3	122	Deg Spondylolisthese L4/5 mit konsekutiver SKS	SD L4/5 (Instrumentierung SOLERA) in TLIF Technik von rechts, Dekompression bds. Duranaht bei intraoperativem Duraleck L4/5 rechts	1	2		6	1	1	1	0
1		0		36	2	97	Spondylolisthese L5/S1 bei Spondyloyse L5 bds.	Dorsale Spondylodese L5/S1, Laminektomie L5, dorsale Instrumentierung L5/S1 (Solera), 2xPLIF-Cage (tezoP), autologe Spongiosa	1	2		5	1		1	1
1		0		73	2	108	Degenerative Spondylolisthese mit einem Gleitweg von knapp 30%,absolute Spinalkanalstenose L4/5	Dors. LordosierungsSD L4-5(Solera) & Deko in TLIF (Tezo-T)	1	2		4	1		1	1
1		0		73	2	82	deg Olisthese L4/5 mit segmentaler Kyphosierung und as SKS	Dorsale Spondylodese L4/5 , dorsale Instrumentierung (System Solera, Medtronic), TLIF-Cage (tezoT, Titan, Fa. Ulrich), posteriore Anlagerung von allogener Spongiosa	1	2		4	1		1	1
2		0		70	3	67	Spondylolisthese L4/5, intraspinale Facettengelenkszyste L3/4 re.	Dorsale Spondylodese L4/5, dorsale Instrumentierung (System Solera, Medtronic), TLIF-Cage (tezoT, Titan, Fa. Ulrich), Dekompression L3/4 von re., posteriore Anlagerung von allogener Spongiosa	1	2		4	1		1	1
1		0		55	3	132	Segmentdegeneration L4/5	dSD L4/5 minimalinvasiv Voll-Wiltse Brainlab navigiert (System Voyager, Medtronic) und TLIF von re Tezo T	1	2		4	1		1	1
1		0		65	2	99	Spondylolisthese L4/5 mit konsekutiver absoluter Spinalkanalstenose L4/5 und Fußheberparese re.	Dorsale Spondylodese L4/5, dorsale Instrumentierung (System Solera, Medtronic), TLIF-Cage (tezoT, Titan, Fa. Ulrich, Gr. 9, M), posteriore Anlagerung von allogener Spongiosa	1	2		4	1		1	1
2		0		63	2	128	deg Spondylolisthese L4/5 mit abs SKS	dSD L4/5(Solera) mit TLIF von li, Facettektomie bds, Dekompression bds	1	2		5	1		1	1
2		0		67	3	72	Spinalkanalstenose und Spondylolisthese L4/5 Grad 1	Dorsale Spondylodese L4/5 , dorsale Instrumentierung (System Solera, Medtronic), TLIF-Cage L4/5 links (tezoT, Titan, Fa. Ulrich), posteriore Anlagerung von allogener Spongiosa	1	2		4	1		1	1
2		0		71	2	97	Lyse L4	Dorsale Spondylodese L4/5 (Solera) & Deko in TLIF (Tezo-T) von links	1	2		5	1		1	1
1		0		68	2	142	Spinalkanalstenose L3-5. spondylolisthese L4/5	Dorsale SpondylodeseL4/5 , dorsale Instrumentierung (System Solera, Medtronic), TLIF-Cage L4/5 links (tezoT, Titan, Fa. Ulrich), posteriore Anlagerung von allogener Spongiosa. Deko L3/4 links over the Top	1	2		22	2		1	0
2		0		65	2	102	deg Listhese mit cranial seq NPP L3/4 li, Spontanfusion L4/5	dSD L3/4 mit TLIF von lin (Solera, Tezo t)n un	1	2		6	1		1	1
1		0		70	2	117	Deg. Listhese L3/4	Dorsale Spondylodese L3/4, dorsale Instrumentierung (System Solera, Medtronic), TLIF-Cage (tezoT, Titan, Fa. Ulrich), posteriore Anlagerung von allogener Spongiosa	1	2		5	1		1	1
2		0		60	2	128	Ventrolisthese L5/S1 bei bds. Spondylolyse L5	Dorsale Spondylodese L5/S1 (Solera), Laminektomie L5 mit Neurolyse der L5-Wurzel TLIF (Tezo-T) von links, Relordosierung	1	2		4	1		1	1
1		0		82	3	114	deg Lumbalskoliose mit Instabilität L3/4 und abs SKS L2-4	minimalinvasive dSD L3/4 computernavigiert mit PLIF L3/4 und Deko L2.4 von li	1	2		8	1		1	1
2		0		55	2	176	Metastase L4 bei Prostata-Ca	dorsale SD L3-5, Laminektomie L4	1	2		4	1	1	2	0
1		0		75	3	136	Spinalkanalstenose L4-S1	Dorsale Spondylodese L4-S1 , dorsale Instrumentierung (System Solera, Medtronic), TLIF-Cage L4/5 links L5/S1 rechts (tezoT, Titan, Fa. Ulrich), posteriore Anlagerung von allogener Spongiosa	1	2		6	1		2	1
1		0		90	3	124	Hochgradige Spinalkanalstenose L2/3 und L3/4 bei Osteochondrose	Dorsale Spondylodese L2-L4, dorsale Instrumentierung (System Solera, Medtronic), Laminektomie L2 und L3, posteriore Anlagerung von allogener Spongiosa	1	2		10	1		2	0
1		0		82	3	130	Deg. Spondylolisthese L3/4, osteoligamentäre SPK L1/2	Dorsale Spondylodese L3/4, dorsale Instrumentierung (System Solera, Medtronic), TLIF-Cage von rechts (tezoT 10mmS, Titan, Fa. Ulrich), posteriore Anlagerung von allogener Spongiosa, mikrochir. Dekompression L1/2 von links	1	2		5	1		1	1
1		0		74	2	167	Degeneratieve Spondylisthese L4/5 mit SKS L4/5, intraoperative Duraläsion an der ventralen Schulter von der Nervenwurzel L5 links	Dorsale Spondylodese L4/5, dorsale Instrumentierung (System Solera, Medtronic), TLIF-Cage (tezoT, Titan, Fa. Ulrich), posteriore Anlagerung von allogener Spongiosa, Duranaht (3xfach) und Tachosilplastik, mikrochirurgische Dekompression von links	1	2		6	1	1	1	0
2		0		57	2	124	Spondylolyse L5	Spondylodese mit Laminektomie und intercorporeller,posterolat Fusion (Tezo P Fa Ullrich, Solera Fa Medtronic)	1	2		6	1		1	0
2		0		73	3	63	LWK 1-Fraktur	dorsale SD BWK 11-LWK2	1	2		5	1		2	1
2		0		81	3	74	Degenerative Spondylolisthese L4/5	Dorsale Spondylodese L4/5, dorsale Instrumentierung (System Solera, Medtronic), TLIF-Cage (tezoT, Titan, Fa. Ulrich) von rechts, posteriore Anlagerung von allogener Spongiosa	1	2		4	1		1	1
1		0		84	2	80	Degenerative Spondylolisthese L4/5, intraoperativ zwei Duraläsionen	Dorsale Spondylodese L4/5, dorsale Instrumentierung (System Solera, Medtronic), TLIF-Cage (tezoT, Titan, Fa. Ulrich), 2x Duranaht, Fettpatchplastik, posteriore Anlagerung von allogener Spongiosa	1	2		4	1	1	1	1
1		0		49	2	83	erosive Osteochondrose L3/4	dSD L3/4 (Solera, TezoT)	1	2		4	1		1	1
1		0		81	3	75	LWK 1 frkatur	dorsale SD TH12-LWK 2	1	2		8	1		2	0
2		0		53	2	145	Lytische Olsisthese L5/S1 mit 20% Gleitweg	Spondylodese intercorporell und posterolateral L5/S1	1	2		4	1		1	0
1		0		69	3	97	Degenerative Spondylolisthese L4/5 sowie Spinalkanalstenose L3-5	Dorsale Spondylodese L4/5, dorsale Instrumentierung (System Solera, Medtronic), TLIF-Cage (tezoT, Titan, Fa. Ulrich) von links, posteriore Anlagerung von allogener Spongiosa sowie Dekompression L3-5 von links	1	2		9	1		1	1
1		0		85	2	102	Degenerative Instabilität L3/4 mit konsektuiver Spinalkanalstenose L3/4	Dorsale Spondylodese L3/4, dorsale Instrumentierung (System Solera, Medtronic), TLIF-Cage von rechts (tezoT, Titan, Fa. Ulrich), Dekompression L3/4 von rechts sowie "over-the-top" zur Gegenseite, posteriore Anlagerung von allogener Spongiosa	1	2		8	1		1	1
1		0		76	3	132	Listhese L4/5 mit hochgradiger konsekutiver Spinalkanalstenose	Spondylodese L4/5 mit Dekompression von re over the top	1	2		5	1		1	1
1		0		57	2	87	Frontale Instabilität - Translation L2/3	Spondylodese L2/3 (SOLERA) in PLIF Technik von links.	1	2		5	1		1	1
2		0		72	2	109	Degenerative Spondylolisthese L4/5 mit Spinalkanalstenose	Dorsale Spondylodese L4/5, dorsale Instrumentierung (System Solera, Medtronic), TLIF-Cage (tezoT, Titan, Fa. Ulrich), posteriore Anlagerung von allogener Spongiosa	1	2		6	1		1	0
1		0		71	2	62	Osteochondrose L4/5 mit SKS L3-5	Dorsale Spondylodese L4/5, dorsale Instrumentierung (System Solera, Medtronic), TLIF-Cage (tezoT 10mmS, Titan, Fa. Ulrich), Facettectomie con links und OTT zur Gegenseite, Neurolyse L4 und L5posteriore Anlagerung von allogener Spongiosa	1	2		4	1		1	1
1		0		57	2	76	Spondylolisthesis mit hochgradiger Spinalkanalstenose L4/5	Dorsale Spondylodese , dorsale Instrumentierung (System Solera, Medtronic), TLIF-Cage L4/5 von links (tezoT, Titan, Fa. Ulrich), posteriore Anlagerung von allogener Spongiosa	1	2		4	1		1	1
1		0		55	2	87	Deg. Spondylolisthese L4/5 mit konsekutiver Spinalkanalstenose	Dorsale Spondylodese L4/5, dorsale Instrumentierung (System Solera, Medtronic), TLIF-Cage (tezoT 9mmS, Titan, Fa. Ulrich), posteriore Anlagerung von allogener Spongiosa	1	2		4	1		1	1
1		0		35	2	98	Lytische Spondylolisthese L5/S1 bei Spondyloyse L5 bds.	Dorsale Spondylodese L5/S1 (Solera), Laminektomie L5, PLIF (Tezo-P) bds.	1	2		4	1		1	1
1		0		65	3	64	Spinalkanalstenose L4/5 hochgrdige bei Spondylolishtese L4/5	Dorsale Spondylodese , dorsale Instrumentierung (System Solera, Medtronic), TLIF-Cage L4/5 von links(tezoT, Titan, Fa. Ulrich), posteriore Anlagerung von allogener Spongiosa	1	2		5	1		1	1
2		0		78	2	98	deg Olisthese L4/5 mit abs SKS, iatrogene Duraläsion li L4/5	dors KorrekturSD L4/5 (Solera, Medtronic) mit bds Fecettektomie und Dekompression, intracorp Fusion mit autologer Spongiosa, Fettpatchplastik	1	2		13	1		1	1
1		0		84	2	87	Spondylolisthesis L4/5 Meyerdingrad I, Iatrogene Duraläsion zentral	Dorsale Spondylodese , dorsale Instrumentierung (System Solera, Medtronic), TLIF-Cage von links (tezoT, Titan, Fa. Ulrich), posteriore Anlagerung von allogener Spongiosa. mikroschirugische Duranaht, primär versorgt	1	2		21	1	1	1	1
1		0		80	2	71	Hochgradige konsekutive Spinalkanalstenose L3-5 Schizas D Spondylolisthese L4/5 Meyerding Grad I	Dorsale Spondylodese L4/5 (Solera) & Deko in TLIF (Tezo-T)	1	2		4	1	1	1	1
2		0		63	2	119	Drehgleiten, Translation L3/4 (Übergangsstörung)und hochgradige Spinalkanalstenose L2-4	SD L3/4 interkorporell und posterolateral, Dekompression l2-4 von li	1	2		5	1		1	1
1		0		56	2	115	Lumbalskoliose mit SKS L3-5	Korrekturspondylodese L3-5 (Solera) in TLIF Technik von rechts. Deko L3/4 re, Deko L4/5 bds, ventrales Release	1	2		5	1		2	1
1		0		74	3	103	Foraminale Engen L4/5 bds.	Dorsale Spondylodese L4/5, dorsale Instrumentierung (System Solera, Medtronic), Facettectomie bds., posteriore Anlagerung von allogener Spongiosa	1	2		5	1		1	0
2		0		35	2	96	Spondylolyse L5/S1	Spondylodese L5/S1 (SOLERA) in PLIF Technik (2x Tezo-P), Laminektomie L5, Neurolyse L5 bds	1	2		5	1		1	1
2		0		67	2	163	Hochgradige Spinalkanalstenose L2-4 bei Spondylolisthesis L2-4	Dorsale Spondylodese L2_4 , dorsale Instrumentierung (System Solera, Medtronic), TLIF-Cage L2-3 L3-4 von links (tezoT, Titan, Fa. Ulrich), posteriore Anlagerung von allogener Spongiosa. Over the Top Dekompression L2-4	1	2		5	1		2	0
1		0		57	2	93	Hochgradige Spinalkalstenose L1/2 bei Kyphose L1/2 und verknöchertem BSV L1/2	Dorsale Spondylodese L1/2 (Solera) & Deko in TLIF (Tezo-T) von links, Hemilaminektomei links mt Undercutting over the top zu Gegenseite	1	2		5	1		1	1
2		0		51	2	171	lyt. Olisthese L5/S1 NPP L5/S1 re med.lat.	Spondylodese intercorporell (2*PLIF) und postero-lateral (Eigenspongiosa	1	2		5	1		1	0
2	Wundrevision and debridement	1		30	2	112	Neoarthros S1/2	Dorsale Spondylodese S1/2 (Solera), Anfrischung Neoarthros S1/2 bds, Posterolaterale Fusion mit Perossal (computer-navigiert)	1	1		4	1		1	0
1		0		74	2	50	deg Instabilität mit abs SKS L3/4 bei deg Lumbalskoliose	dSD L3/4 (Solera) mit TLIF von re und Deko, post Fusion L3/4 li	1	2		8	1		1	1
1		0		62	3	68	Degeneratieve Spondylolisthese L3/4 mit konsektuiver Spinalkanalstenose L3/4	Dorsale Spondylodese L3/4, dorsale Instrumentierung L3/4 (System Solera, Medtronic), TLIF-Cage (tezoT, Titan, Fa. Ulrich) von links, posteriore Anlagerung von allogener Spongiosa	1	2		4	1		1	1
2		0		64	2	161	Treppenphänomen L3-5	dorsale SD L3-5	1	2		5	1		2	1
1		0		77	3	129	Listehese L4/5 mit konsek. Spinalkanalstenose	Dorsale Spondylodese L4/5, dorsale Instrumentierung (System Solera, Medtronic), TLIF-Cage (tezoT, Titan, Fa. Ulrich), posteriore Anlagerung von allogener Spongiosa	1	2		7	1		1	0
1		0		52	2	66	Spinalkanalstenose L4/5 mit Spondylolisthese L4/5	Dorsale Spondylodese L4/5, dorsale Instrumentierung L4/5 (System Solera, Medtronic), TLIF-Cage von links (tezoT, Titan, Fa. Ulrich), Dekompression zur Gegenseite, posteriore Anlagerung von allogener Spongiosa	1	2		5	1		1	1
1		0		81	2	122	Spinalkanalstenose L2-5, degenerative Spondylolisthese L3/4, intraoperative Duraläsion L2/3 rechts	Dorsale Spondylodese L3/4, dorsale Instrumentierung L3/4 (System Solera, Medtronic), TLIF-Cage von rechts (tezoT, Titan, Fa. Ulrich), posteriore Anlagerung von allogener Spongiosa, Dekompression L2/3 und L4/5 von rechts, Tachosil-Anlage Duraläsion L2/3 re	1	2		5	1		1	1
1		0		70	2	93	Deg. Spondylolisthese L3/4 mit konsekutiver Spinalkanalstenose, chronischer NPP	SD L3/4 (Instrumentierung SOLERA) in TLIF Technik von links. Teil-Laminektomie L3, Sequestrektomie.	1	2		14	1		1	0
1		0		66	3	224	OC L4/5, absolute SKS L2-5	dorsale SD L4/5, Deko L2-5	1	2		6	1		1	0
1		0		30	2	175	lyt. Olisthese L5/S1	dorsale SD L5/S1	1	2		4	1		1	1
2		0		64	2	129	Deg. Spondylolisthese L4/5 mit konsekutiver SKS L3-5	SD L4/5 (SOLERA) in TLIF Technik von rechts, Deko L4/5 von rechts over-the-top, Deko L3/4 von links over-the-top	1	2		4	1		1	0
2		0		79	3	79	Drehgleiten L3/4	dors. SD L3/4 Solera, Cage (Tezo 8 mm M, FA. Urlich)	1	2		4	1		2	1
1		0		80	3	162	deg Olisthese L4/5 mit abs SKS L3.-5	dSD L4/5 computernavigiert minimalinvasiv über Wiltse Zugänge (Voyager, Medtronic) und mikrochirurgische Deko L3-5 von li mit post Fusion L4/5 li	1	2		13	1		1	1
1		0		61	2	151	hochgradige Spinalkanalstenose Th12 - L2	dorsale SD (Sys. Solera, Fa. Medtronic) sowie Laminektomie Th 12-L2.	1	2		13	1		2	0
1		0		50	2	132	Degenerative Spondylolisthese mit hochgradiger Spinalkanalstenose L4/5	Dorsale Spondylodese L4/5 , dorsale Instrumentierung (System Solera, Medtronic), TLIF-Cage L4/5 von links (tezoT, Titan, Fa. Ulrich), posteriore Anlagerung von autogener Spongiosa+over-the top Dekompression L4/5	1	2		5	1		1	0
1		0		74	2	151	deg Olistehse L4/5 mit abs SKS L3-S1	dSD L4/5 (Solera, Tezo T) mit TLIF von li und Deko OTT, mikrochir Deko L5/S1 re und L3/4 li OTT, post Fusion L4/5 re	1	2		7	1		1	1
2		0		81	2	136	Degenerative Spondylolisthese L4/5 mit hochgradiger Spinalkanalstenose	Dorsale Spondylodese L4/5 , dorsale Instrumentierung (System Solera, Medtronic), TLIF-Cage 10 von rechts (tezoT, Titan, Fa. Ulrich), posteriore Anlagerung von autogener Spongiosa. over-the-top Dekompression L4/5	1	2		4	1		1	0
1	Wundrevision	1		56	2	159	Lytische Spondylolisthese L5/S1 bei Spondylolyse L5	Dorsale Spondylodese L5/S1, dorsale Instrumentierung (System Solera, Medtronic), TLIF-Cage von links (tezoT, Titan, Fa. Ulrich), posteriore Anlagerung von allogener Spongiosa, Laminektomie L5	0	1		4	1		1	0
1		0		61	3	91	Degenerative Spondylolisthese L3/4 mit kon. SKS	Dorsale Spondylodese L3/4, dorsale Instrumentierung (System Solera, Medtronic), TLIF-Cage von links (tezoT, Titan, Fa. Ulrich), posteriore Anlagerung von allogener Spongiosa	1	2		21	1		1	1
2		0		80	2	89	Drehgleiten L3/4 mit konsek Spinalkanalstenose	Spondylodese L3/4 intercorporell und posteolateral, Dekompression L3/4 von re	1	2		9	1		1	1
1		0		70	2	94	Degenerative Spondylolisthess L4/5 mit hoch gradiger lumbaler Spinalkanalstenose L4/5	Dorsale Spondylodese L4/5 , dorsale Instrumentierung (System Solera, Medtronic), TLIF-Cage L4/5 von links (tezoT, Titan, Fa. Ulrich), posteriore Anlagerung von autoener Spongiosa	1	2		6	1		1	0
1		0		70	2	150	Degenerative Instabilität mit grosser Synovialcyste li L4/5	Spondylodese L4/5 li mit mikrochirurgischer Cystenresektion	1	2		4	1		1	0
1		0		68	3	56	Restbeschwerden bei Z.n. mikrochirurgischer Dekompression L4/5 von re.	Dorsale Spondylodese L4/5 (Solera) & Deko in TLIF (Tezo-T)	1	2		12	1		1	1
2		0		40	1	155	Spondylolyse L5 bds.	Dorsale Spondylodese L5/S1 (Solera) & Deko in TLIF (Tezo-T) und Laminektomie	1	2		4	1	1	1	1
1		0		75	2	112	Fraktur LWK 3	Dorsale Instrumentierung L2-4 (System Solera), computernavigiert, zementaugmentiert	1	2		11	1		2	1
1		0		62	2	139	Spondylolisthese L4/5 Méyerding Grad II, lumbale hochgradige Spinalkanalstenose L4/5 Lateral Recess Stenose L5 /S1 links	Dorsale Spondylodese L4/5 , dorsale Instrumentierung (System Solera, Medtronic), TLIF-Cage L4/5 von link (tezoT, Titan, Fa. Ulrich), posteriore Anlagerung von autogener Spongiosa. Lateral Recess Dekompression L5 /S1 links	1	2		5	1		1	0
1		0		53	2	105	Translation 4/5 mit SKS 4/5, SKS 3/4	Dorsale spondylodese, dorsale Instrumentierung (Solera, Titan, Fa. Medtronic), Transversektomie mit vollständiger Resektion der Facettengelenke und des Ligamentum flavum beidseits, ventrales Release, TLIF-Cages von links, Relordosierung, Anlagerung von au	1	2		5	1		1	1
2		0		83	3	97	Hochgradige lumbale Spinalkanalstenose degenerative Spondylolisthese L4/5	Dorsale Spondylodese L4/5 , dorsale Instrumentierung (System Solera, Medtronic), TLIF-Cage L4/5 vo links (tezoT, Titan, Fa. Ulrich), posteriore Anlagerung von autogener Spongiosa. Hemilaminektomie ´L4 links und mikrochirugische Dekompression L3/4 von li	1	2		14	2		1	1
2		0		83	2	93	lumbale Spinalkanalstenose L3-5	Dorsale Spondylodese L4/5 , dorsale Instrumentierung (System Solera, Medtronic), TLIF-Cage L4/5 links (tezoT, Titan, Fa. Ulrich), posteriore Anlagerung von autogener Spongiosa. Mikrochirurgische Dekompression L3/4 rechts	1	2		4	1		1	1
2		0		73	3	175	Spinalkanalstenose L2-5	Dorsale Spondylodese L3-5 , dorsale Instrumentierung (System Solera, Medtronic), TLIF-Cage L3-5 (tezoT, Titan, Fa. Ulrich), posteriore Anlagerung von autogener Spongiosa . Deko L2-3 von rechts over-the-top	1	2		5	1		2	1
1		0		69	2	125	Rechtskonvexe Lumbalskoliose mit linksseitigem Kollaps L3/4 und Translation L4/5	Dorsale Spondylodese L3-5, dorsale Instrumentierung (System Solera, Medtronic), TLIF-Cage (tezoT, Titan, Fa. Ulrich), posteriore Anlagerung von allogener Spongiosa	1	2		4	1		2	1
1		0		72	2	173	Osteochondrose L4-S1, Retrolisthes L4/5	Sd L4-1 intercorporell L4/5 und posterolateral L4-S1 re	1	2		5	1		2	0
2		0		84	3	62	Th11 Spalt-Fraktur mit deutlicher segmentaler Kyphosierung	dorsaleSD Th10-12 (Ennovate, Aesculap) computernativiert	1	2		13	1		2	1
1		0		86	2	88	Osteolytische Fraktur Th10 bei Mamma-Ca	Dorsale computernavigierte Instrumentierung Th9-TH11, PE Th10 links transpedikulär	1	2		6	1		2	1
1		0		86	2	176	SKS L2-5, Antelisthese L4/5, Synovialzyste L3/4 re	SD L4/5 (Sy. Cosmic) über Wiltse Zugang re, Deko L2-5 von rechts over-the-top	1	2		8	1		1	1
2		0		84	3	112	Metastase LWK-2 mit Tumorbefall Pedikel L2 links, Spinalkanalstenose.	SD L1-3 (Sy. Vader), Kyphoplastie-Zementaugmentation LWK-2, Laminektomie L2, Hemilaminektomie L1 links, Pedikelresektion L2 links.Tumor-Debulking	1	2		17	1		2	0
1		0		76	3	172	Fraktur L1 mit konsekutiver Kyphose u. SKS, SKS L3/4	SD L1-3 (SOLERA, zementaugmentiert, computer-navigiert), Laminektomie L1, mikrochirurgische Dekompression L3/4 von links over-the-top. Durnaht-Fettpatch bei Duraleck L1 re und L3/4 links.	1	2		31	3	1	2	0
2		0		71	3	121	Spinalkanalstenose L3-5 Spondyylolisthese L4/5	Mikrochirurgische Dekompression L3/4 von links over -the-top mit hemilaminektomie L4 links.Duraläsion L3/4 links wurde mit Fattpatch versorgtDorsale Spondylodese L4/5 , dorsale Instrumentierung (System Solera, Medtronic), TLIF-Cage L4/5 von links (tezoT	1	2		4	1	1	1	1
1		0		83	3	235	Deg. Spondylolisthese L4/5, absolute SKS L2-L5	Dorsale Korrekturspondylodese L4/5, interkorporelle Fusion mittels Titan-Cage (Tezo T, Fa. Ulrich) und autologer Spongiosa, Fixateur interne (System Solera, Fa. Medtronic), vollständige Transversektomie li. und Relordosierung. Dekompression L2-S1, Duranah	1	2		17	1	1	1	0
1		0		71	2	53	Th8 Fraktur	dorsale minimalinvasive perfasziale Instrumentierung Th7-9 (Ennovate, Aesculap)	1	2		11	1		2	1
1		0		45	2	137	Spondylolyse L5	Spondylodese intercorporell und postero-lateral L5/S1	1	2		4	1		1	0
2		0		58	2	129	Degenerative Instabilität L4/5 mit konsekutiver Spinalkanalstenose	Dors. LordosierungsSD … (Solera) & Deko in TLIF (Tezo-T)	1	2		4	1		1	0
2		0		82	3	135	abs SKS L3-S1 mit deg Intabilität frontal L4/5	Dorsale Spondylodese L4/5, dorsale Instrumentierung (System Solera, Medtronic), TLIF-Cage (tezoT, Titan, Fa. Ulrich), posteriore Anlagerung von allogener Spongiosa und mikrochirurgische Dekompression L3-S1 von links	1	2		4	1		1	1
1		0		47	2	66	Fraktur LWK-2	Instrumentierung L1-3 (Sy Ennovate) über Mittelschnitt - transfaszial	1	2		9	1		2	1
1		0		72	2	116	Skoliose , SKS L3-5	dorslae SD L3/4, Deko L3-5	1	2		4	1		1	0
1		0		64	2	58	deg Olisthese L4/5 mit abs SKS	Dorsale Spondylodese L4/5 , dorsale Instrumentierung (System Solera, Medtronic), TLIF-Cage (tezoT, Titan, Fa. Ulrich), posteriore Anlagerung von allogener Spongiosa	1	2		4	1		1	1
1		0		55	2	77	Deg. Spondylolisthese L4/5 mit konsekutiver SKS	Dors. SD L4/5 (Solera) & Deko in TLIF Technik von rechts (Tezo-T)	1	2		9	1		1	1
1		0		47	2	187	Lytische Olisthese mit 20% Gleitweg L5/S1	Dorsale Spondylodese L5/S1, Laminektomie L5 , dorsale Instrumentierung (System Solera, Medtronic), TLIF-Cage (tezoT, Titan, Fa. Ulrich), posteriore Anlagerung von autologer Spongiosa	1	2		6	1		1	0
2		0		48	3	80	Facettegelenksarthrose L4/5	Dors. SD L4/5 (Solera) & Deko in TLIF (Tezo-T) von rechts	1	2		4	1		1	1
1		0		66	3	148	Drehgleiten L4/5 , SKS L3-5	Dorsale Spondylodese , dorsale Instrumentierung (System Solera, Medtronic), TLIF-Cage (tezoT, Titan, Fa. Ulrich), posteriore Anlagerung von autologer Spongiosa, Deko L3-5 von re	1	2		4	1		1	0
1		0		83	2	70	Fraktur L3, SKS L3/4	SD L2-4 (System Voyager, Fa Medtronic), Dekompression L3/4 rechts, posterolaterale Fusion mit Perossal	1	2		9	1		2	1
1		0		80	2	52	deg Olisthese L4/5 mit abs SKS	dSD L4/5 ´(Solera, Medtronic) mit re TLIF (Tezo T) und post Fusion mit autologer Spongiosa sowie Dekompression	1	2		5	1		1	1
2		0		80	2	133	Spinalkanalstenose L2-5mit Degenerative Instabilität L4/5	Dorsale Spondylodese L4/5 (Solera) & Deko in TLIF (Tezo-T)und Dekompression L2-5 von links	1	2		15	2		1	0
1		0		71	3	139	degenerative Spondylolisthese L4/5, Spinalkanalstenose L3/4	Dorsale Spondylodese L4/5, dorsale Instrumentierung (System Solera, Medtronic), TLIF-Cage (tezoT 9mmM, Titan, Fa. Ulrich), mikrochir. Dekompression L3/4 von rechts und over the top zur Gegenseite, posteriore Anlagerung von autologer Spongiosa	1	2		6	1		1	0
1		0		72	2	72	Degenerative spondylolisthese L3/4 mit Spoinalkanalstenose	Dorsale Spondylodese L3/4 , dorsale Instrumentierung (System Solera, Medtronic), TLIF-Cage (tezoT, Titan, Fa. Ulrich), posteriore Anlagerung von autologer Spongiosa	1	2		4	1		1	1
2		0		66	2	96	Degenerative Spondylolisthese L4/5 mit absoluter Spinalkanalstenose	Dorsale Spondylodese L4/5, dorsale Instrumentierung (System Solera, Medtronic), TLIF-Cage (tezoT, Titan, Fa. Ulrich), posteriore Anlagerung von autologer Spongiosa	1	2		4	1		1	0
1		0		50	2	73	Facettenarthrose bei Hypermobilität bei Z.n. Bandschienprothese L4/5	minimalinvasive navigierte dorsale Spondylodese L4/5 in WIltse Technik (Voyager, Medtronic) mit post Fusion mit PeOssal	1	2		4	1		1	1
2		0		79	3	143	degenerative Spondylolisthese L4/5, osteoligamentäre Spinalkanalstenose L3/4	Dorsale Spondylodese L4/5 , dorsale Instrumentierung (System Solera, Medtronic), TLIF-Cage von links (tezoT 10mmM, Titan, Fa. Ulrich), posteriore Anlagerung von autologer Spongiosa, Mikrochirurgische Dekompression L3/4 rechts	1	2		8	1		1	0
1		0		68	2	101	degenerative Spondylolisthese L4/5 mit konsekutiver Spinalkanalstenose	Dorsale Spondylodese L4/5, dorsale Instrumentierung (System Solera, Medtronic), TLIF-Cage (tezoT 8mmS, Titan, Fa. Ulrich), posteriore Anlagerung von autologer Spongiosa	1	2		4	1		1	1
2		0		65	2	150	path Fraktur mit TU Einbruch in Spinalkanal LWK3, Tu Einbruch in Spinalkanal L5-S2, Spontanfusion L5/S1	dSD L2-4 (Solera, Medtronic) mit Hemilaminektomie L3 von links und undercutting nach rechts, post Fusion L2-4 mit Perossal rechts, Dekompression mikrochirurgisch L5-S2 mit Laminektomie S1+S2	1	2		11	2		2	0
1		0		74	3	201	Bisegmentale Listhese L3-5 bei Spontanfusion L5/S1	Dors. LordosierungsSD L3-5 (Solera) & Dekoüer Hemilaminktomie mit Eigenspongiosa	1	2		7	1		2	0
1		0		62	2	104	Deg. Spondylolisthese L4/5	Dorsale Spondylodese (Solera) & Deko in TLIF (Tezo-T) L4/5	1	2		5	1		1	0
2		0		71	3	64	Degenerative Spondylolisthese L4/5	Dorsale Spondylodese L4/5 (Solera, Medtronic) und intervertebrale Cage L4/5 (Tezo T Ulrich)	1	2		4	1		1	1
2		0		84	2	74	Ausgeprägte Degeneration mit Drehgleiten im Segment L2/3, L3/4Absolute Spinalkanalstenose L3/4	Dors. Spondylodese L3/4 (System Solera, Fa. Medtronic )& Dekompression. Kleine ventrale Duraläsion mit Fatpatch versorgt.	1	2		11	1	1	1	1
2		0		83	3	93	Drehgleiten L3/4 bei li konvexer Skoliose und Spinalkanalstenose L3-5	Dorsale Spondylodese L3/4, dorsale Instrumentierung (System Solera, Medtronic), TLIF-Cage (tezoT, Titan, Fa. Ulrich), posteriore Anlagerung von autologer Spongiosa, Dekompression L3-5 von li	1	2		7	1		1	1
1		0		81	3	136	deg. Spondylolisthese L4/5	Dorsale Spondylodese , dorsale Instrumentierung (System Solera, Medtronic), TLIF-Cage (tezoT, Titan, Fa. Ulrich), posteriore Anlagerung von autologer Spongiosa L4/5	1	2		5	1		1	0
2		0		65	2	160	Chronischer medianer NPP L4/5 bei deg. Instabilität	Dorsale Spondylodese L4/5 , dorsale Instrumentierung (System Solera, Medtronic), TLIF-Cage (tezoT, Titan, Fa. Ulrich) von links, Dekompression u. Sequestrektomie links, posteriore Anlagerung von autologer Spongiosa	1	2		6	1		1	1
2		0		77	3	168	SKS L2-5, Spondylolisthese L4/5 bei Lumbalskoliose	Dorsale Spondylodese L4/5, dorsale Instrumentierung (System Solera, Medtronic), TLIF-Cage (tezoT, Titan, Fa. Ulrich) von links, Dekompression-Facettektomie L4/5 bds, Dekompression L2-4 von links over-the-top, posteriore Anlagerung von autologer Spongiosa	1	2		9	1		1	0
1		0		69	2	138	Degenerative Spondylolisthsen mit Treppenphänomen L4-S1 mit Spinalkanalstenos	Dorsale Spondylodese L4-S1, dorsale Instrumentierung (System Solera, Medtronic), TLIF-Cage (tezoT, Titan, Fa. Ulrich), posteriore Anlagerung von autologer Spongiosa	1	2		4	1		2	0
2		0		60	2	206	abs SKS L2-4, fixierte deg Antelisthese ohne SKS L4/5	dSD L3/4 (Solera, Medtronic) computernavigiert mit TLIF von re, Deko L2/3 mikrochirugisch von rechts	1	2		5	1		1	1
2	Wundrevision	1	14	59	3	209	S1 Schraubenbruch bds. bei Z.n lythischer Listhese L5/S1	RevSD mit Erweiterung auf os ilium	0	1	A2	30	2		2	0
2	Wundrevision	1	13	66	3	188	post deko syndrom L4/5 mit listhese und restenose	SD L4/5 . legacy, intervertebral Tetzo, redeko und Zysten entfernung bds	0	1	A1	32	2		1	0
2	Wundrevision	1	5	71	2	138	Ventrolisthese L5/S1 mit hochgradiger Spinalkanalstensoe und Formanestensoe L5 bes., Spondylolyse L5 rechts, Spinalkanalstenose L4/5	Dorsale relordosierende Korrekturspondylodese L4-S1 (System Legacy, Medtronic) nach Zielke, Neurolyse L5-Wurzel bds., 2x TLIF-Cage von links, Laminektomie L5	1	1	A2	15	2		2	0
2	Wundrevision	1	19	62	2	105	Postnukleotomiesyndrom bei Re-Rezidiv NPP L4/5 rechts	Dorsale Spondylodese L4/5, dorsoventrale Korrektur (System Legacy, Medtronic), TLIF-Cage von links (tezoT 10mm, Titan, Fa. Ulrich), posteriore Anlagerung von allogener Spongiosa	1	1	A1	22	2		1	1
1	Wundrevision	1	7	60	2	136	Schraubenfehlage L3 und l5 bei V.a. Pseudarthrose L3-5	Schraubenrevision L3 li und L5 rechts, erweiterte posterolaterale Fusion	0	1	A2	14	2		2	1
2	Wundrevision VAC	1	17	30	2	112	Neoarthros S1/2	Dorsale Spondylodese S1/2 (Solera), Anfrischung Neoarthros S1/2 bds, Posterolaterale Fusion mit Perossal (computer-navigiert)	1	1	A2	4	1		1	0
